# Supplementary material for: Alleleomes characterize the survivors of 3.5 billion years of bacterial evolution
Source: Research Square preprint supplement (doi:10.21203/rs.3.rs-3168663/v1), 2023-07-27
Supplement: Supplementary file 1 [file 74acc58141cfc58a97dd49f6.xlsx]

## Sheet: DatasetS1-genomeIds_and_metadat
	This Study (from GTDB release 202)	PATRIC metadata (~33% populated)			NCBI metadata ('attributes', sparse)
genomeId	species	Collection Year	Isolation Country	Host Common Name	biotic_relationship	ontological term	Title	Study_group	passage_history	collection data	host_phenotype	wastewater_type	Annotation Provider	Relevant e-resources	antigenic formula	collection_date	note2	locus_tag prefix	investigation_type	environment	tax id	source_laboratory_prior_to_NRRL	sample_name	checkm_contamination	Sporulation	ENA-CHECKLIST	host_common_name	AssemblyVersion	isolation_source	serogroup	heavy_metals	tdh	MLST Value	Collaborator ID	Phagetype	environmental-sample	fecal	trophic_level	Antiqua	biovar	Genome size (bp)	Community or hospital acquired infection	subtype	source_type	host_tissue_sample	Nucleic acid preparation	annual_season_temp	geographic location (longitude)	Submitter Id
GCF_000722965.1	Acinetobacter_baumannii
GCF_000592155.1	Acinetobacter_baumannii
GCF_000592195.1	Acinetobacter_baumannii
GCF_000592215.1	Acinetobacter_baumannii
GCF_000592255.1	Acinetobacter_baumannii
GCF_000592295.1	Acinetobacter_baumannii
GCF_000592355.1	Acinetobacter_baumannii
GCF_000592375.1	Acinetobacter_baumannii
GCF_000592395.1	Acinetobacter_baumannii
GCF_000592435.1	Acinetobacter_baumannii
GCF_000592455.1	Acinetobacter_baumannii
GCF_000592475.1	Acinetobacter_baumannii
GCF_000592135.1	Acinetobacter_baumannii
GCF_000592495.1	Acinetobacter_baumannii
GCF_000592675.1	Acinetobacter_baumannii
GCF_000592695.1	Acinetobacter_baumannii
GCF_000592715.1	Acinetobacter_baumannii
GCF_000592735.1	Acinetobacter_baumannii
GCF_007999645.1	Acinetobacter_baumannii
GCF_000600375.1	Acinetobacter_baumannii
GCF_000600395.1	Acinetobacter_baumannii
GCF_000600435.1	Acinetobacter_baumannii
GCF_000600455.1	Acinetobacter_baumannii
GCF_000600475.1	Acinetobacter_baumannii
GCF_000600535.1	Acinetobacter_baumannii
GCF_000592655.1	Acinetobacter_baumannii
GCF_000592095.1	Acinetobacter_baumannii
GCF_000592035.1	Acinetobacter_baumannii
GCF_000591975.1	Acinetobacter_baumannii
GCF_000589375.1	Acinetobacter_baumannii
GCF_000589395.1	Acinetobacter_baumannii
GCF_000589415.1	Acinetobacter_baumannii
GCF_000589435.1	Acinetobacter_baumannii
GCF_000589475.1	Acinetobacter_baumannii
GCF_000589515.1	Acinetobacter_baumannii
GCF_000589535.1	Acinetobacter_baumannii
GCF_000589555.1	Acinetobacter_baumannii
GCA_008709595.1	Acinetobacter_baumannii	set([])	set(['India'])	set(['Human'])
GCF_000589595.1	Acinetobacter_baumannii
GCF_000589615.1	Acinetobacter_baumannii
GCF_000589635.1	Acinetobacter_baumannii
GCF_000589655.1	Acinetobacter_baumannii
GCF_000589675.1	Acinetobacter_baumannii
GCF_000589715.1	Acinetobacter_baumannii
GCF_000589755.1	Acinetobacter_baumannii
GCF_000589775.1	Acinetobacter_baumannii
GCF_000589795.1	Acinetobacter_baumannii
GCF_000589835.1	Acinetobacter_baumannii
GCF_000591715.1	Acinetobacter_baumannii
GCF_000591855.1	Acinetobacter_baumannii
GCF_000591875.1	Acinetobacter_baumannii
GCF_000591915.1	Acinetobacter_baumannii
GCF_000591935.1	Acinetobacter_baumannii
GCF_000591955.1	Acinetobacter_baumannii
GCF_000600655.1	Acinetobacter_baumannii
GCF_000600695.1	Acinetobacter_baumannii
GCF_000600715.1	Acinetobacter_baumannii
GCF_000600735.1	Acinetobacter_baumannii
GCF_000611545.1	Acinetobacter_baumannii
GCF_000623015.1	Acinetobacter_baumannii
GCF_000623035.1	Acinetobacter_baumannii
GCA_005280395.1	Acinetobacter_baumannii	set([2018.0])	set(['India'])	set(['Human'])
GCF_000627355.1	Acinetobacter_baumannii
GCF_000627375.1	Acinetobacter_baumannii
GCF_000627395.1	Acinetobacter_baumannii
GCF_000627415.1	Acinetobacter_baumannii
GCF_000627535.1	Acinetobacter_baumannii
GCF_000627555.1	Acinetobacter_baumannii
GCF_000627575.1	Acinetobacter_baumannii
GCF_000627595.1	Acinetobacter_baumannii
GCF_000627675.1	Acinetobacter_baumannii
GCF_000627695.1	Acinetobacter_baumannii
GCF_000627715.1	Acinetobacter_baumannii
GCF_000627735.1	Acinetobacter_baumannii
GCF_000627755.1	Acinetobacter_baumannii
GCF_006658595.1	Acinetobacter_baumannii
GCF_006658565.1	Acinetobacter_baumannii
GCF_006494665.1	Acinetobacter_baumannii
GCF_006494615.1	Acinetobacter_baumannii
GCF_006494285.1	Acinetobacter_baumannii
GCF_900608095.1	Acinetobacter_baumannii
GCF_006494265.1	Acinetobacter_baumannii
GCF_006494255.1	Acinetobacter_baumannii
GCF_000611525.1	Acinetobacter_baumannii
GCF_000589355.1	Acinetobacter_baumannii
GCF_000611485.1	Acinetobacter_baumannii
GCF_000611445.1	Acinetobacter_baumannii
GCF_000600755.1	Acinetobacter_baumannii
GCF_000600795.1	Acinetobacter_baumannii
GCF_000600815.1	Acinetobacter_baumannii
GCF_000600835.1	Acinetobacter_baumannii
GCF_000600855.1	Acinetobacter_baumannii
GCF_000600875.1	Acinetobacter_baumannii
GCF_000600895.1	Acinetobacter_baumannii
GCF_000600915.1	Acinetobacter_baumannii
GCF_000600935.1	Acinetobacter_baumannii
GCF_007833195.1	Acinetobacter_baumannii
GCF_007833155.1	Acinetobacter_baumannii
GCA_008365335.2	Acinetobacter_baumannii	set([1997.0])	set(['Argentina'])	set(['Human'])
GCF_007107525.1	Acinetobacter_baumannii
GCF_000611045.1	Acinetobacter_baumannii
GCF_000611105.1	Acinetobacter_baumannii
GCF_000611165.1	Acinetobacter_baumannii
GCF_000611185.1	Acinetobacter_baumannii
GCF_000611205.1	Acinetobacter_baumannii
GCF_000611225.1	Acinetobacter_baumannii
GCF_000611245.1	Acinetobacter_baumannii
GCF_000611265.1	Acinetobacter_baumannii
GCF_000611305.1	Acinetobacter_baumannii
GCF_000611345.1	Acinetobacter_baumannii
GCF_000611385.1	Acinetobacter_baumannii
GCF_000611405.1	Acinetobacter_baumannii
GCF_000611465.1	Acinetobacter_baumannii
GCF_000589315.1	Acinetobacter_baumannii
GCF_000589295.1	Acinetobacter_baumannii
GCF_000589275.1	Acinetobacter_baumannii
GCF_000582175.1	Acinetobacter_baumannii
GCF_000582215.1	Acinetobacter_baumannii
GCF_000582275.1	Acinetobacter_baumannii
GCF_000582295.1	Acinetobacter_baumannii
GCF_000582335.1	Acinetobacter_baumannii
GCF_000582355.1	Acinetobacter_baumannii
GCF_000582945.1	Acinetobacter_baumannii
GCF_000583235.1	Acinetobacter_baumannii
GCF_000583255.1	Acinetobacter_baumannii
GCF_000583275.1	Acinetobacter_baumannii
GCF_000583295.1	Acinetobacter_baumannii
GCF_000583315.1	Acinetobacter_baumannii
GCF_000583455.1	Acinetobacter_baumannii
GCF_000583475.1	Acinetobacter_baumannii
GCF_000583495.1	Acinetobacter_baumannii
GCF_000583515.1	Acinetobacter_baumannii
GCF_000583595.1	Acinetobacter_baumannii
GCF_000584035.1	Acinetobacter_baumannii
GCF_000584075.1	Acinetobacter_baumannii
GCF_000584095.1	Acinetobacter_baumannii
GCF_000584135.1	Acinetobacter_baumannii
GCF_000584155.1	Acinetobacter_baumannii
GCF_000584175.1	Acinetobacter_baumannii
GCF_000584235.1	Acinetobacter_baumannii
GCF_000584275.1	Acinetobacter_baumannii
GCF_000582155.1	Acinetobacter_baumannii
GCF_000584295.1	Acinetobacter_baumannii
GCF_000582035.1	Acinetobacter_baumannii
GCF_000581995.1	Acinetobacter_baumannii
GCF_000581075.1	Acinetobacter_baumannii
GCF_000581135.1	Acinetobacter_baumannii
GCF_000581155.1	Acinetobacter_baumannii
GCF_000581175.1	Acinetobacter_baumannii
GCF_000581235.1	Acinetobacter_baumannii
GCF_000581255.1	Acinetobacter_baumannii
GCF_000581315.1	Acinetobacter_baumannii
GCF_000581355.1	Acinetobacter_baumannii
GCF_000581375.1	Acinetobacter_baumannii
GCF_000581395.1	Acinetobacter_baumannii
GCF_000581415.1	Acinetobacter_baumannii
GCF_000581515.1	Acinetobacter_baumannii
GCF_000581575.1	Acinetobacter_baumannii
GCF_000581635.1	Acinetobacter_baumannii
GCF_000581655.1	Acinetobacter_baumannii
GCF_000581755.1	Acinetobacter_baumannii
GCF_000581775.1	Acinetobacter_baumannii
GCF_000581815.1	Acinetobacter_baumannii
GCF_000581855.1	Acinetobacter_baumannii
GCF_000581875.1	Acinetobacter_baumannii
GCA_011398515.1	Acinetobacter_baumannii	set([])	set([])	set(['Human'])
GCF_000581895.1	Acinetobacter_baumannii
GCF_000581915.1	Acinetobacter_baumannii
GCF_000581935.1	Acinetobacter_baumannii
GCF_000581975.1	Acinetobacter_baumannii
GCF_000582015.1	Acinetobacter_baumannii
GCF_006494225.1	Acinetobacter_baumannii
GCF_000584335.1	Acinetobacter_baumannii
GCF_000584395.1	Acinetobacter_baumannii
GCF_000588375.1	Acinetobacter_baumannii
GCF_000588435.1	Acinetobacter_baumannii
GCF_000588455.1	Acinetobacter_baumannii
GCF_000588475.1	Acinetobacter_baumannii
GCF_000588575.1	Acinetobacter_baumannii
GCF_000588615.1	Acinetobacter_baumannii
GCF_000588635.1	Acinetobacter_baumannii
GCF_000588655.1	Acinetobacter_baumannii
GCF_000588675.1	Acinetobacter_baumannii
GCF_000588695.1	Acinetobacter_baumannii
GCF_000588735.1	Acinetobacter_baumannii
GCF_000588755.1	Acinetobacter_baumannii
GCF_000588775.1	Acinetobacter_baumannii
GCF_000588795.1	Acinetobacter_baumannii
GCF_000588815.1	Acinetobacter_baumannii
GCF_000588895.1	Acinetobacter_baumannii
GCF_000588915.1	Acinetobacter_baumannii
GCF_000588935.1	Acinetobacter_baumannii
GCF_000588955.1	Acinetobacter_baumannii
GCF_000588975.1	Acinetobacter_baumannii
GCF_000588995.1	Acinetobacter_baumannii
GCF_000589035.1	Acinetobacter_baumannii
GCF_000589075.1	Acinetobacter_baumannii
GCF_000589095.1	Acinetobacter_baumannii
GCF_000589195.1	Acinetobacter_baumannii
GCF_000588355.1	Acinetobacter_baumannii
GCF_000584355.1	Acinetobacter_baumannii
GCF_000588315.1	Acinetobacter_baumannii
GCF_000588235.1	Acinetobacter_baumannii
GCF_000584415.1	Acinetobacter_baumannii
GCF_000584435.1	Acinetobacter_baumannii
GCF_000584455.1	Acinetobacter_baumannii
GCF_000584495.1	Acinetobacter_baumannii
GCF_000584555.1	Acinetobacter_baumannii
GCF_000584595.1	Acinetobacter_baumannii
GCF_000584655.1	Acinetobacter_baumannii
GCF_000584675.1	Acinetobacter_baumannii
GCF_000584695.1	Acinetobacter_baumannii
GCF_000584715.1	Acinetobacter_baumannii
GCF_000584755.1	Acinetobacter_baumannii
GCF_000584835.1	Acinetobacter_baumannii
GCF_000584855.1	Acinetobacter_baumannii
GCF_000584875.1	Acinetobacter_baumannii
GCF_000584895.1	Acinetobacter_baumannii
GCF_000586635.1	Acinetobacter_baumannii
GCF_000587895.1	Acinetobacter_baumannii
GCF_000587935.1	Acinetobacter_baumannii
GCF_000587955.1	Acinetobacter_baumannii
GCF_000588035.1	Acinetobacter_baumannii
GCF_000588075.1	Acinetobacter_baumannii
GCF_000588115.1	Acinetobacter_baumannii
GCF_000588135.1	Acinetobacter_baumannii
GCF_000588155.1	Acinetobacter_baumannii
GCF_000588195.1	Acinetobacter_baumannii
GCF_000588295.1	Acinetobacter_baumannii
GCF_000581015.1	Acinetobacter_baumannii
GCF_006494215.1	Acinetobacter_baumannii
GCF_006494085.1	Acinetobacter_baumannii
GCF_000682655.1	Acinetobacter_baumannii
GCF_900496905.1	Acinetobacter_baumannii
GCA_003843735.1	Acinetobacter_baumannii	set([2011.0])	set(['South Korea'])	set(['Human'])
GCA_003843655.1	Acinetobacter_baumannii	set([2010.0])	set(['South Korea'])	set(['Human'])
GCA_003843645.1	Acinetobacter_baumannii	set([2012.0])	set(['South Korea'])	set(['Human'])
GCA_003843625.1	Acinetobacter_baumannii	set([2011.0])	set(['South Korea'])	set(['Human'])
GCF_000692095.1	Acinetobacter_baumannii
GCF_000708775.1	Acinetobacter_baumannii	set([2012.0])	set(['USA'])	set(['Human'])
GCF_000722975.1	Acinetobacter_baumannii
GCF_004282835.1	Acinetobacter_baumannii
GCF_004209715.1	Acinetobacter_baumannii
GCF_000682595.1	Acinetobacter_baumannii
GCA_003627485.2	Acinetobacter_baumannii	set([2017.0])	set(['India'])	set(['Human'])
GCF_004209075.1	Acinetobacter_baumannii
GCF_004209005.1	Acinetobacter_baumannii
GCF_000731965.1	Acinetobacter_baumannii	set([])	set(['France'])	set(['Human'])
GCF_000731975.1	Acinetobacter_baumannii
GCF_004208995.1	Acinetobacter_baumannii
GCF_004194555.1	Acinetobacter_baumannii
GCF_000734775.1	Acinetobacter_baumannii	set([2012.0])	set(['China'])	set(['Human'])
GCF_000738845.1	Acinetobacter_baumannii	set([2010.0])	set(['USA'])	set(['Human'])
GCF_000746605.1	Acinetobacter_baumannii	set([2010.0])	set(['Canada'])	set(['Human'])
GCF_000746645.1	Acinetobacter_baumannii	set([2010.0])	set(['Canada'])	set(['Human'])
GCF_004153595.1	Acinetobacter_baumannii
GCF_004209195.1	Acinetobacter_baumannii
GCF_000682575.1	Acinetobacter_baumannii
GCF_000682495.1	Acinetobacter_baumannii
GCF_000682475.1	Acinetobacter_baumannii
GCF_004794275.2	Acinetobacter_baumannii
GCF_004794205.1	Acinetobacter_baumannii
GCF_004768705.1	Acinetobacter_baumannii
GCF_004758865.1	Acinetobacter_baumannii
GCF_004564095.1	Acinetobacter_baumannii
GCF_004378505.1	Acinetobacter_baumannii
GCF_004378295.1	Acinetobacter_baumannii
GCF_004378285.1	Acinetobacter_baumannii
GCF_004359905.1	Acinetobacter_baumannii
GCF_004357125.1	Acinetobacter_baumannii
GCF_004357105.1	Acinetobacter_baumannii
GCF_004357095.1	Acinetobacter_baumannii
GCF_004354165.1	Acinetobacter_baumannii
GCF_004354145.1	Acinetobacter_baumannii
GCF_004354125.1	Acinetobacter_baumannii
GCF_004347305.1	Acinetobacter_baumannii
GCF_000681595.1	Acinetobacter_baumannii
GCF_000681635.1	Acinetobacter_baumannii
GCF_000681655.1	Acinetobacter_baumannii
GCF_000681755.1	Acinetobacter_baumannii
GCF_000681775.1	Acinetobacter_baumannii
GCF_000681795.1	Acinetobacter_baumannii
GCF_000681835.1	Acinetobacter_baumannii
GCF_000682415.1	Acinetobacter_baumannii
GCF_000682455.1	Acinetobacter_baumannii
GCF_004152715.1	Acinetobacter_baumannii
GCF_004152685.1	Acinetobacter_baumannii
GCF_000757665.1	Acinetobacter_baumannii
GCF_000759395.1	Acinetobacter_baumannii
GCF_000805035.1	Acinetobacter_baumannii
GCF_000805045.1	Acinetobacter_baumannii
GCF_000805065.1	Acinetobacter_baumannii
GCF_000805115.1	Acinetobacter_baumannii
GCF_000805135.1	Acinetobacter_baumannii
GCA_003359255.2	Acinetobacter_baumannii
GCF_000805195.1	Acinetobacter_baumannii
GCF_000805205.1	Acinetobacter_baumannii
GCF_000805215.1	Acinetobacter_baumannii
GCF_000805515.1	Acinetobacter_baumannii
GCF_000805525.1	Acinetobacter_baumannii
GCF_000805535.1	Acinetobacter_baumannii
GCF_000805615.1	Acinetobacter_baumannii
GCF_000808785.3	Acinetobacter_baumannii
GCF_000809065.3	Acinetobacter_baumannii
GCF_000809085.3	Acinetobacter_baumannii
GCF_000809205.3	Acinetobacter_baumannii
GCF_000809215.3	Acinetobacter_baumannii
GCF_000809235.3	Acinetobacter_baumannii
GCF_000809325.3	Acinetobacter_baumannii
GCF_000809365.3	Acinetobacter_baumannii
GCF_000809525.3	Acinetobacter_baumannii
GCF_000809545.3	Acinetobacter_baumannii
GCF_000809785.3	Acinetobacter_baumannii
GCF_000809905.3	Acinetobacter_baumannii
GCF_000804955.1	Acinetobacter_baumannii	set([2004.0])	set(['China'])	set(['Human'])
GCF_000671655.1	Acinetobacter_baumannii
GCF_000804905.1	Acinetobacter_baumannii	set([2005.0])	set(['China'])	set(['Human'])
GCF_000804875.1	Acinetobacter_baumannii
GCF_000760395.1	Acinetobacter_baumannii	set([])	set(['Japan'])	set([])
GCF_000760435.1	Acinetobacter_baumannii	set([])	set(['Japan'])	set([])
GCF_000761175.1	Acinetobacter_baumannii
GCF_000761465.1	Acinetobacter_baumannii
GCF_004136925.1	Acinetobacter_baumannii
GCF_004136355.1	Acinetobacter_baumannii
GCF_000766105.1	Acinetobacter_baumannii
GCF_000770785.1	Acinetobacter_baumannii
GCF_000770805.1	Acinetobacter_baumannii
GCF_000770815.1	Acinetobacter_baumannii
GCF_000770865.1	Acinetobacter_baumannii
GCF_000770905.1	Acinetobacter_baumannii
GCF_000787225.1	Acinetobacter_baumannii
GCF_000787275.1	Acinetobacter_baumannii
GCF_004101685.1	Acinetobacter_baumannii
GCF_000794125.1	Acinetobacter_baumannii
GCF_003994455.1	Acinetobacter_baumannii
GCF_003991295.1	Acinetobacter_baumannii
GCF_003970215.1	Acinetobacter_baumannii
GCF_003966015.1	Acinetobacter_baumannii
GCF_000802915.1	Acinetobacter_baumannii
GCF_000804645.1	Acinetobacter_baumannii
GCF_000804725.1	Acinetobacter_baumannii
GCF_000804805.1	Acinetobacter_baumannii	set([2011.0])	set(['China'])	set(['Human'])
GCF_000804825.1	Acinetobacter_baumannii	set([2011.0])	set(['China'])	set(['Human'])
GCF_000804885.1	Acinetobacter_baumannii
GCF_000671575.1	Acinetobacter_baumannii
GCF_000671555.1	Acinetobacter_baumannii
GCF_000671535.1	Acinetobacter_baumannii
GCF_006492575.1	Acinetobacter_baumannii
GCF_006492525.1	Acinetobacter_baumannii
GCF_006492515.1	Acinetobacter_baumannii
GCF_006492495.1	Acinetobacter_baumannii
GCF_006492425.1	Acinetobacter_baumannii
GCF_006492405.1	Acinetobacter_baumannii
GCF_006492385.1	Acinetobacter_baumannii
GCF_006492335.1	Acinetobacter_baumannii
GCF_006492315.1	Acinetobacter_baumannii
GCF_006492305.1	Acinetobacter_baumannii
GCF_006492295.1	Acinetobacter_baumannii
GCF_006492215.1	Acinetobacter_baumannii
GCF_006492195.1	Acinetobacter_baumannii
GCF_006492175.1	Acinetobacter_baumannii
GCF_006492125.1	Acinetobacter_baumannii
GCF_006492085.1	Acinetobacter_baumannii
GCF_006492075.1	Acinetobacter_baumannii
GCF_006492065.1	Acinetobacter_baumannii
GCF_006492055.1	Acinetobacter_baumannii
GCF_006491975.1	Acinetobacter_baumannii
GCF_006491955.1	Acinetobacter_baumannii
GCF_006491885.1	Acinetobacter_baumannii
GCF_006491875.1	Acinetobacter_baumannii
GCF_006491865.1	Acinetobacter_baumannii
GCF_006491855.1	Acinetobacter_baumannii
GCF_006492635.1	Acinetobacter_baumannii
GCF_006385075.1	Acinetobacter_baumannii
GCF_006492675.1	Acinetobacter_baumannii
GCF_006492705.1	Acinetobacter_baumannii
GCF_006494075.1	Acinetobacter_baumannii
GCF_006494065.1	Acinetobacter_baumannii
GCF_006494015.1	Acinetobacter_baumannii
GCF_006493975.1	Acinetobacter_baumannii
GCF_006493955.1	Acinetobacter_baumannii
GCF_006493945.1	Acinetobacter_baumannii
GCF_006493915.1	Acinetobacter_baumannii
GCF_006493845.1	Acinetobacter_baumannii
GCF_006493835.1	Acinetobacter_baumannii
GCF_006493735.1	Acinetobacter_baumannii
GCF_006493705.1	Acinetobacter_baumannii
GCF_006493645.1	Acinetobacter_baumannii
GCA_004794165.2	Acinetobacter_baumannii
GCF_006493045.1	Acinetobacter_baumannii
GCF_006493035.1	Acinetobacter_baumannii
GCF_006493005.1	Acinetobacter_baumannii
GCF_006492985.1	Acinetobacter_baumannii
GCF_006492965.1	Acinetobacter_baumannii
GCF_006492945.1	Acinetobacter_baumannii
GCF_006492885.1	Acinetobacter_baumannii
GCF_006492865.1	Acinetobacter_baumannii
GCF_006492855.1	Acinetobacter_baumannii
GCF_006492795.1	Acinetobacter_baumannii
GCF_006492775.1	Acinetobacter_baumannii
GCF_006492715.1	Acinetobacter_baumannii
GCF_006492685.1	Acinetobacter_baumannii
GCF_006494155.1	Acinetobacter_baumannii
GCF_006369835.1	Acinetobacter_baumannii
GCF_006369755.1	Acinetobacter_baumannii
GCF_005819085.1	Acinetobacter_baumannii
GCF_005819065.1	Acinetobacter_baumannii
GCF_005819005.1	Acinetobacter_baumannii
GCF_005785845.1	Acinetobacter_baumannii
GCF_005785665.1	Acinetobacter_baumannii
GCF_005785275.1	Acinetobacter_baumannii
GCF_005785265.1	Acinetobacter_baumannii
GCF_005785185.1	Acinetobacter_baumannii
GCF_005784875.1	Acinetobacter_baumannii
GCF_005671375.1	Acinetobacter_baumannii
GCF_005518095.1	Acinetobacter_baumannii
GCF_005298065.1	Acinetobacter_baumannii
GCF_005280715.1	Acinetobacter_baumannii
GCF_005280695.1	Acinetobacter_baumannii
GCF_005280675.1	Acinetobacter_baumannii
GCF_005280435.1	Acinetobacter_baumannii
GCF_005280415.1	Acinetobacter_baumannii
GCF_005280375.1	Acinetobacter_baumannii
GCF_005280355.1	Acinetobacter_baumannii
GCF_004912245.1	Acinetobacter_baumannii
GCF_004912235.1	Acinetobacter_baumannii
GCF_004799225.1	Acinetobacter_baumannii
GCF_000671415.1	Acinetobacter_baumannii
GCF_000671475.1	Acinetobacter_baumannii
GCF_000671495.1	Acinetobacter_baumannii
GCF_005819115.1	Acinetobacter_baumannii
GCF_006369795.1	Acinetobacter_baumannii
GCF_005819175.1	Acinetobacter_baumannii
GCF_005819225.1	Acinetobacter_baumannii
GCF_006367745.1	Acinetobacter_baumannii
GCF_006367395.1	Acinetobacter_baumannii
GCF_006367345.1	Acinetobacter_baumannii
GCF_006367045.1	Acinetobacter_baumannii
GCF_006366905.1	Acinetobacter_baumannii
GCF_006366635.1	Acinetobacter_baumannii
GCF_006366595.1	Acinetobacter_baumannii
GCF_006366335.1	Acinetobacter_baumannii
GCF_006366235.1	Acinetobacter_baumannii
GCF_006365965.1	Acinetobacter_baumannii
GCF_006365945.1	Acinetobacter_baumannii
GCF_006365405.1	Acinetobacter_baumannii
GCF_005863385.1	Acinetobacter_baumannii
GCF_005863345.1	Acinetobacter_baumannii
GCF_005863285.1	Acinetobacter_baumannii
GCF_005819765.1	Acinetobacter_baumannii
GCF_005819755.1	Acinetobacter_baumannii
GCF_005819705.1	Acinetobacter_baumannii
GCF_005819645.1	Acinetobacter_baumannii
GCF_005819545.1	Acinetobacter_baumannii
GCF_005819425.1	Acinetobacter_baumannii
GCF_005819375.1	Acinetobacter_baumannii
GCF_005819325.1	Acinetobacter_baumannii
GCF_005819315.1	Acinetobacter_baumannii
GCF_005819275.1	Acinetobacter_baumannii
GCF_005819215.1	Acinetobacter_baumannii
GCF_000580995.1	Acinetobacter_baumannii
GCF_000580975.1	Acinetobacter_baumannii
GCF_000580895.1	Acinetobacter_baumannii
GCF_000297575.1	Acinetobacter_baumannii
GCF_000297595.1	Acinetobacter_baumannii
GCF_000297915.1	Acinetobacter_baumannii
GCF_000297935.1	Acinetobacter_baumannii
GCF_000301175.1	Acinetobacter_baumannii
GCF_000301195.1	Acinetobacter_baumannii
GCF_000301235.1	Acinetobacter_baumannii
GCF_000301275.1	Acinetobacter_baumannii
GCF_000301295.1	Acinetobacter_baumannii
GCF_000301315.1	Acinetobacter_baumannii
GCF_000301335.1	Acinetobacter_baumannii
GCF_000297535.1	Acinetobacter_baumannii
GCF_000301355.1	Acinetobacter_baumannii
GCF_000301455.1	Acinetobacter_baumannii
GCF_000301515.1	Acinetobacter_baumannii
GCF_000301555.1	Acinetobacter_baumannii
GCF_000301575.1	Acinetobacter_baumannii
GCA_901485025.1	Acinetobacter_baumannii	set([])	set([])	set([])
GCA_901484965.1	Acinetobacter_baumannii	set([])	set([])	set([])
GCA_901484925.1	Acinetobacter_baumannii	set([])	set([])	set([])
GCF_000301835.1	Acinetobacter_baumannii
GCF_000301875.1	Acinetobacter_baumannii
GCF_000301975.1	Acinetobacter_baumannii
GCF_000301995.1	Acinetobacter_baumannii
GCF_000301415.1	Acinetobacter_baumannii
GCF_000297515.1	Acinetobacter_baumannii
GCF_000292545.1	Acinetobacter_baumannii
GCF_000286615.1	Acinetobacter_baumannii
GCF_000248275.1	Acinetobacter_baumannii
GCF_900161995.1	Acinetobacter_baumannii
GCF_900161985.1	Acinetobacter_baumannii
GCF_900161965.1	Acinetobacter_baumannii
GCF_900161955.1	Acinetobacter_baumannii
GCF_900161945.1	Acinetobacter_baumannii
GCF_900161895.1	Acinetobacter_baumannii
GCF_900161885.1	Acinetobacter_baumannii
GCF_900157395.1	Acinetobacter_baumannii	set([2015.0])	set([])	set(['Human'])
GCF_900119395.1	Acinetobacter_baumannii
GCF_900118075.2	Acinetobacter_baumannii
GCF_900118065.2	Acinetobacter_baumannii
GCF_900118055.2	Acinetobacter_baumannii
GCF_900117985.2	Acinetobacter_baumannii
GCF_900117965.2	Acinetobacter_baumannii
GCF_900117875.2	Acinetobacter_baumannii
GCF_900117635.2	Acinetobacter_baumannii
GCF_900117535.2	Acinetobacter_baumannii
GCF_900117505.2	Acinetobacter_baumannii
GCF_900117495.2	Acinetobacter_baumannii
GCF_900117405.1	Acinetobacter_baumannii
GCF_900088705.1	Acinetobacter_baumannii	set([])	set([])	set([])
GCF_000278645.1	Acinetobacter_baumannii
GCF_000278685.1	Acinetobacter_baumannii
GCF_000286535.1	Acinetobacter_baumannii
GCF_000302015.1	Acinetobacter_baumannii
GCF_000302055.1	Acinetobacter_baumannii
GCF_000302075.1	Acinetobacter_baumannii
GCF_000302135.1	Acinetobacter_baumannii
GCF_012931605.1	Acinetobacter_baumannii
GCF_012781995.1	Acinetobacter_baumannii
GCF_012524085.1	Acinetobacter_baumannii
GCF_012515875.1	Acinetobacter_baumannii
GCF_000333715.1	Acinetobacter_baumannii
GCF_000333735.1	Acinetobacter_baumannii
GCF_000335535.1	Acinetobacter_baumannii
GCF_000335595.1	Acinetobacter_baumannii
GCF_000335615.1	Acinetobacter_baumannii
GCF_000335635.1	Acinetobacter_baumannii
GCF_000335655.1	Acinetobacter_baumannii
GCF_000335675.1	Acinetobacter_baumannii
GCA_900608375.1	Acinetobacter_baumannii	set([2017.0])	set(['Switzerland'])	set(['Human'])
GCA_900608255.1	Acinetobacter_baumannii	set([2017.0])	set(['Switzerland'])	set(['Human'])
GCA_900607765.1	Acinetobacter_baumannii	set([2017.0])	set(['Switzerland'])	set(['Human'])
GCA_900607735.1	Acinetobacter_baumannii	set([2017.0])	set(['Switzerland'])	set(['Human'])
GCA_900607695.1	Acinetobacter_baumannii	set([2017.0])	set(['Switzerland'])	set(['Human'])
GCA_900607625.1	Acinetobacter_baumannii	set([2017.0])	set(['Switzerland'])	set(['Human'])
GCF_900519195.1	Acinetobacter_baumannii
GCF_000338835.1	Acinetobacter_baumannii
GCF_000342085.1	Acinetobacter_baumannii
GCF_012277115.1	Acinetobacter_baumannii
GCF_012276735.1	Acinetobacter_baumannii
GCF_012272715.1	Acinetobacter_baumannii
GCF_000353775.1	Acinetobacter_baumannii
GCF_012931625.1	Acinetobacter_baumannii
GCF_900175185.1	Acinetobacter_baumannii
GCF_012931665.1	Acinetobacter_baumannii
GCF_012974585.1	Acinetobacter_baumannii
GCF_000302155.1	Acinetobacter_baumannii
GCF_000302235.1	Acinetobacter_baumannii
GCF_000302255.1	Acinetobacter_baumannii
GCF_000302575.1	Acinetobacter_baumannii
GCF_000304675.1	Acinetobacter_baumannii
GCF_000305215.1	Acinetobacter_baumannii
GCF_000305235.1	Acinetobacter_baumannii
GCF_000305275.1	Acinetobacter_baumannii
GCF_000305315.1	Acinetobacter_baumannii
GCF_900043985.1	Acinetobacter_baumannii
GCF_000307895.1	Acinetobacter_baumannii
GCF_900042755.1	Acinetobacter_baumannii
GCF_000308995.1	Acinetobacter_baumannii
GCF_000309095.1	Acinetobacter_baumannii
GCF_000309115.1	Acinetobacter_baumannii
GCF_000309135.1	Acinetobacter_baumannii
GCF_000309195.1	Acinetobacter_baumannii
GCF_000309235.1	Acinetobacter_baumannii
GCF_000309255.1	Acinetobacter_baumannii
GCF_900029375.1	Acinetobacter_baumannii
GCF_900020545.1	Acinetobacter_baumannii
GCF_900011295.1	Acinetobacter_baumannii
GCF_900010465.1	Acinetobacter_baumannii
GCF_000314635.1	Acinetobacter_baumannii
GCF_000314655.1	Acinetobacter_baumannii
GCF_012952675.1	Acinetobacter_baumannii
GCF_000241725.1	Acinetobacter_baumannii
GCF_000241705.1	Acinetobacter_baumannii
GCF_000241685.1	Acinetobacter_baumannii
GCF_900495315.1	Acinetobacter_baumannii
GCF_900495295.1	Acinetobacter_baumannii
GCF_900495275.1	Acinetobacter_baumannii
GCF_900495235.1	Acinetobacter_baumannii
GCF_900495205.1	Acinetobacter_baumannii
GCF_900495165.1	Acinetobacter_baumannii
GCF_900495125.1	Acinetobacter_baumannii
GCF_900495045.1	Acinetobacter_baumannii
GCF_900495025.1	Acinetobacter_baumannii
GCF_900494875.1	Acinetobacter_baumannii
GCF_900494865.1	Acinetobacter_baumannii
GCF_900494495.1	Acinetobacter_baumannii
GCF_900494435.1	Acinetobacter_baumannii
GCF_900490095.1	Acinetobacter_baumannii
GCF_000018445.1	Acinetobacter_baumannii
GCF_000021245.2	Acinetobacter_baumannii
GCF_900478055.2	Acinetobacter_baumannii
GCF_900477915.1	Acinetobacter_baumannii
GCF_900477875.1	Acinetobacter_baumannii
GCF_900477855.2	Acinetobacter_baumannii
GCF_900477605.2	Acinetobacter_baumannii
GCF_900477595.2	Acinetobacter_baumannii
GCF_900477565.2	Acinetobacter_baumannii
GCF_900477485.2	Acinetobacter_baumannii
GCF_900477425.2	Acinetobacter_baumannii
GCF_900495345.1	Acinetobacter_baumannii
GCF_000069245.1	Acinetobacter_baumannii
GCF_900495355.1	Acinetobacter_baumannii
GCF_900495405.1	Acinetobacter_baumannii
GCF_900496865.1	Acinetobacter_baumannii
GCF_900496845.1	Acinetobacter_baumannii
GCF_900496795.1	Acinetobacter_baumannii
GCF_900496745.1	Acinetobacter_baumannii
GCF_900496725.1	Acinetobacter_baumannii
GCF_900496665.1	Acinetobacter_baumannii
GCF_900496585.1	Acinetobacter_baumannii
GCF_900496555.1	Acinetobacter_baumannii
GCF_900496535.1	Acinetobacter_baumannii
GCF_900496485.1	Acinetobacter_baumannii
GCF_900496455.1	Acinetobacter_baumannii
GCF_900496415.1	Acinetobacter_baumannii
GCF_900496185.1	Acinetobacter_baumannii
GCF_900496155.1	Acinetobacter_baumannii
GCF_900496085.1	Acinetobacter_baumannii
GCF_900496045.1	Acinetobacter_baumannii
GCF_900495975.1	Acinetobacter_baumannii
GCF_900495925.1	Acinetobacter_baumannii
GCF_900495885.1	Acinetobacter_baumannii
GCF_900495645.1	Acinetobacter_baumannii
GCF_900495605.1	Acinetobacter_baumannii
GCF_900495575.1	Acinetobacter_baumannii
GCF_900495545.1	Acinetobacter_baumannii
GCF_900495485.1	Acinetobacter_baumannii
GCF_900495415.1	Acinetobacter_baumannii
GCF_900495385.1	Acinetobacter_baumannii
GCF_000353795.1	Acinetobacter_baumannii
GCF_900477305.2	Acinetobacter_baumannii
GCF_900477125.2	Acinetobacter_baumannii
GCF_000189675.1	Acinetobacter_baumannii
GCF_000189695.1	Acinetobacter_baumannii
GCF_000214985.1	Acinetobacter_baumannii
GCF_000215005.1	Acinetobacter_baumannii
GCF_000222225.1	Acinetobacter_baumannii
GCF_000222245.1	Acinetobacter_baumannii
GCF_000222265.1	Acinetobacter_baumannii
GCF_900444775.1	Acinetobacter_baumannii
GCF_900444755.1	Acinetobacter_baumannii
GCF_900444745.1	Acinetobacter_baumannii
GCF_900444735.1	Acinetobacter_baumannii
GCF_000226275.2	Acinetobacter_baumannii
GCF_900406775.1	Acinetobacter_baumannii
GCF_900406765.1	Acinetobacter_baumannii
GCF_900406745.1	Acinetobacter_baumannii
GCF_900406735.1	Acinetobacter_baumannii
GCF_900406725.1	Acinetobacter_baumannii
GCF_900406715.1	Acinetobacter_baumannii
GCF_900406695.1	Acinetobacter_baumannii
GCF_900406685.1	Acinetobacter_baumannii
GCF_900406675.1	Acinetobacter_baumannii
GCF_900406665.1	Acinetobacter_baumannii
GCF_900406655.1	Acinetobacter_baumannii
GCF_900406645.1	Acinetobacter_baumannii
GCF_900240205.1	Acinetobacter_baumannii
GCF_000189655.1	Acinetobacter_baumannii
GCF_900477155.2	Acinetobacter_baumannii
GCF_000188215.1	Acinetobacter_baumannii
GCF_000186665.3	Acinetobacter_baumannii
GCF_900477115.2	Acinetobacter_baumannii
GCF_900477075.2	Acinetobacter_baumannii
GCF_900477055.2	Acinetobacter_baumannii
GCF_900476975.2	Acinetobacter_baumannii
GCF_900476965.2	Acinetobacter_baumannii
GCF_900476945.2	Acinetobacter_baumannii
GCF_900476865.2	Acinetobacter_baumannii
GCF_900476855.2	Acinetobacter_baumannii
GCF_900476825.2	Acinetobacter_baumannii
GCF_900476815.2	Acinetobacter_baumannii
GCF_900476805.2	Acinetobacter_baumannii
GCF_900476755.2	Acinetobacter_baumannii
GCF_900476745.2	Acinetobacter_baumannii
GCF_900476665.2	Acinetobacter_baumannii
GCF_900476585.2	Acinetobacter_baumannii
GCF_900476565.2	Acinetobacter_baumannii
GCF_000162295.1	Acinetobacter_baumannii
GCF_000163355.2	Acinetobacter_baumannii
GCF_000163375.2	Acinetobacter_baumannii
GCF_000163395.2	Acinetobacter_baumannii
GCF_000173395.1	Acinetobacter_baumannii
GCF_000184475.1	Acinetobacter_baumannii
GCF_000184495.1	Acinetobacter_baumannii
GCF_000184515.1	Acinetobacter_baumannii
GCF_000186645.1	Acinetobacter_baumannii
GCF_000187205.2	Acinetobacter_baumannii
GCF_000353815.1	Acinetobacter_baumannii
GCF_000353855.1	Acinetobacter_baumannii
GCF_000353895.1	Acinetobacter_baumannii
GCF_009736405.1	Acinetobacter_baumannii
GCF_009736345.1	Acinetobacter_baumannii
GCF_009736305.1	Acinetobacter_baumannii
GCF_009736285.1	Acinetobacter_baumannii
GCF_009736245.1	Acinetobacter_baumannii
GCF_009736205.1	Acinetobacter_baumannii
GCF_009736145.1	Acinetobacter_baumannii
GCF_009736115.1	Acinetobacter_baumannii
GCF_009736095.1	Acinetobacter_baumannii
GCF_009736025.1	Acinetobacter_baumannii
GCF_000513795.2	Acinetobacter_baumannii
GCF_000515495.1	Acinetobacter_baumannii
GCF_000515535.1	Acinetobacter_baumannii
GCF_000515555.1	Acinetobacter_baumannii
GCF_000515595.1	Acinetobacter_baumannii
GCF_000515635.1	Acinetobacter_baumannii
GCF_000515655.1	Acinetobacter_baumannii
GCF_000515675.1	Acinetobacter_baumannii
GCF_000515735.1	Acinetobacter_baumannii
GCF_000515875.2	Acinetobacter_baumannii
GCF_000515895.1	Acinetobacter_baumannii
GCF_000515935.1	Acinetobacter_baumannii
GCF_000515975.1	Acinetobacter_baumannii
GCF_000515995.2	Acinetobacter_baumannii
GCF_000516095.1	Acinetobacter_baumannii
GCF_009736455.1	Acinetobacter_baumannii
GCF_000516135.1	Acinetobacter_baumannii
GCF_009736505.1	Acinetobacter_baumannii
GCF_009736865.1	Acinetobacter_baumannii
GCF_009829535.1	Acinetobacter_baumannii
GCF_009829525.1	Acinetobacter_baumannii
GCF_000465635.2	Acinetobacter_baumannii
GCF_009828675.1	Acinetobacter_baumannii
GCF_009760645.1	Acinetobacter_baumannii
GCF_009760305.1	Acinetobacter_baumannii
GCF_009760235.1	Acinetobacter_baumannii
GCF_009759905.1	Acinetobacter_baumannii
GCF_009754985.1	Acinetobacter_baumannii
GCF_009753665.1	Acinetobacter_baumannii
GCF_000493615.1	Acinetobacter_baumannii
GCF_000498375.2	Acinetobacter_baumannii
GCF_000505685.1	Acinetobacter_baumannii
GCF_009738065.1	Acinetobacter_baumannii
GCF_009737795.1	Acinetobacter_baumannii
GCF_009737735.1	Acinetobacter_baumannii
GCF_009737575.1	Acinetobacter_baumannii
GCF_009737525.1	Acinetobacter_baumannii
GCA_900093475.1	Acinetobacter_baumannii	set([1800.0])	set([])	set([])
GCF_009737505.1	Acinetobacter_baumannii
GCF_009736975.1	Acinetobacter_baumannii
GCF_009736935.1	Acinetobacter_baumannii
GCF_009736925.1	Acinetobacter_baumannii
GCF_000509325.1	Acinetobacter_baumannii
GCF_000509345.1	Acinetobacter_baumannii
GCF_009736605.1	Acinetobacter_baumannii
GCF_009829555.1	Acinetobacter_baumannii
GCF_000516155.1	Acinetobacter_baumannii
GCF_000516255.1	Acinetobacter_baumannii
GCF_008581485.1	Acinetobacter_baumannii
GCF_008581385.1	Acinetobacter_baumannii
GCF_008477565.1	Acinetobacter_baumannii
GCF_008180145.1	Acinetobacter_baumannii
GCF_008124045.1	Acinetobacter_baumannii
GCF_000580135.1	Acinetobacter_baumannii
GCF_000580155.1	Acinetobacter_baumannii
GCF_000580175.1	Acinetobacter_baumannii
GCF_000580195.1	Acinetobacter_baumannii
GCF_000580215.1	Acinetobacter_baumannii
GCF_000580235.1	Acinetobacter_baumannii
GCF_000580315.1	Acinetobacter_baumannii
GCF_000580355.1	Acinetobacter_baumannii	set([2011.0])	set(['USA'])	set(['Human'])
GCF_000580455.1	Acinetobacter_baumannii
GCF_000580495.1	Acinetobacter_baumannii	set([2012.0])	set(['USA'])	set(['Human'])
GCF_000580535.1	Acinetobacter_baumannii
GCF_000580555.1	Acinetobacter_baumannii
GCF_000580575.1	Acinetobacter_baumannii
GCF_000580595.1	Acinetobacter_baumannii
GCF_000580695.1	Acinetobacter_baumannii
GCF_000580735.1	Acinetobacter_baumannii
GCF_000580775.1	Acinetobacter_baumannii
GCF_000580815.1	Acinetobacter_baumannii
GCF_000580835.1	Acinetobacter_baumannii
GCF_000580875.1	Acinetobacter_baumannii
GCF_008581605.1	Acinetobacter_baumannii
GCF_000516215.2	Acinetobacter_baumannii
GCF_008581715.1	Acinetobacter_baumannii
GCF_008632635.1	Acinetobacter_baumannii
GCF_000516575.2	Acinetobacter_baumannii
GCF_000517485.2	Acinetobacter_baumannii	set([2007.0])	set(['USA'])	set(['Human'])
GCF_009645825.1	Acinetobacter_baumannii
GCF_009645815.1	Acinetobacter_baumannii
GCF_009645685.1	Acinetobacter_baumannii
GCF_009498335.1	Acinetobacter_baumannii
GCF_009497995.1	Acinetobacter_baumannii
GCF_009497515.1	Acinetobacter_baumannii
GCF_009497505.1	Acinetobacter_baumannii
GCF_009497435.1	Acinetobacter_baumannii
GCF_009455505.1	Acinetobacter_baumannii
GCF_009445405.1	Acinetobacter_baumannii
GCF_009428985.1	Acinetobacter_baumannii
GCF_009268055.1	Acinetobacter_baumannii
GCF_008931365.1	Acinetobacter_baumannii
GCF_008830885.1	Acinetobacter_baumannii
GCF_008830715.1	Acinetobacter_baumannii
GCF_008806535.1	Acinetobacter_baumannii
GCF_008802935.1	Acinetobacter_baumannii
GCF_008801795.1	Acinetobacter_baumannii
GCF_008726135.1	Acinetobacter_baumannii
GCF_008709745.1	Acinetobacter_baumannii
GCF_008709685.1	Acinetobacter_baumannii
GCF_008709665.1	Acinetobacter_baumannii
GCF_008709565.1	Acinetobacter_baumannii
GCF_008581785.1	Acinetobacter_baumannii
GCF_000809925.3	Acinetobacter_baumannii
GCF_009829595.1	Acinetobacter_baumannii
GCF_000453925.1	Acinetobacter_baumannii
GCF_000369325.1	Acinetobacter_baumannii
GCF_000369345.1	Acinetobacter_baumannii
GCF_000369365.1	Acinetobacter_baumannii
GCF_000369385.1	Acinetobacter_baumannii	set([1911.0])	set([])	set(['Human'])
GCF_011075215.1	Acinetobacter_baumannii
GCF_010500645.1	Acinetobacter_baumannii
GCF_010500635.1	Acinetobacter_baumannii
GCF_010500625.1	Acinetobacter_baumannii
GCF_010500585.1	Acinetobacter_baumannii
GCF_010500565.1	Acinetobacter_baumannii
GCF_010500545.1	Acinetobacter_baumannii
GCF_010500475.1	Acinetobacter_baumannii
GCF_010500435.1	Acinetobacter_baumannii
GCF_010500415.1	Acinetobacter_baumannii
GCF_010500315.1	Acinetobacter_baumannii
GCF_010500265.1	Acinetobacter_baumannii
GCF_010500255.1	Acinetobacter_baumannii
GCF_010500235.1	Acinetobacter_baumannii
GCF_010500025.1	Acinetobacter_baumannii
GCF_010500015.1	Acinetobacter_baumannii
GCF_010499945.1	Acinetobacter_baumannii
GCF_000413915.1	Acinetobacter_baumannii
GCF_010499885.1	Acinetobacter_baumannii
GCF_010499835.1	Acinetobacter_baumannii
GCF_010499805.1	Acinetobacter_baumannii
GCF_000369305.1	Acinetobacter_baumannii
GCF_010499785.1	Acinetobacter_baumannii
GCF_000369285.1	Acinetobacter_baumannii
GCF_000369245.1	Acinetobacter_baumannii
GCF_000353915.1	Acinetobacter_baumannii
GCF_000353955.1	Acinetobacter_baumannii
GCF_000354075.1	Acinetobacter_baumannii
GCF_011683235.1	Acinetobacter_baumannii
GCF_011603345.1	Acinetobacter_baumannii
GCF_011603305.1	Acinetobacter_baumannii
GCF_011603295.1	Acinetobacter_baumannii
GCF_011602545.1	Acinetobacter_baumannii
GCF_011602535.1	Acinetobacter_baumannii
GCF_011602165.1	Acinetobacter_baumannii
GCF_011601965.1	Acinetobacter_baumannii
GCF_011601725.1	Acinetobacter_baumannii
GCF_011601385.1	Acinetobacter_baumannii
GCF_000367885.1	Acinetobacter_baumannii
GCF_000368125.1	Acinetobacter_baumannii
GCF_000368185.1	Acinetobacter_baumannii
GCF_000368205.1	Acinetobacter_baumannii
GCF_000368225.1	Acinetobacter_baumannii
GCF_000368245.1	Acinetobacter_baumannii
GCF_000368525.1	Acinetobacter_baumannii
GCF_000368545.1	Acinetobacter_baumannii
GCF_000369165.1	Acinetobacter_baumannii
GCF_000369185.1	Acinetobacter_baumannii
GCF_000369205.1	Acinetobacter_baumannii
GCF_000369225.1	Acinetobacter_baumannii
GCF_000369265.1	Acinetobacter_baumannii
GCF_000453965.1	Acinetobacter_baumannii
GCF_010499775.1	Acinetobacter_baumannii
GCF_010499675.1	Acinetobacter_baumannii
GCF_009901675.1	Acinetobacter_baumannii
GCF_009901665.1	Acinetobacter_baumannii
GCF_009888065.1	Acinetobacter_baumannii
GCF_009887905.1	Acinetobacter_baumannii
GCF_009887795.1	Acinetobacter_baumannii
GCF_009887785.1	Acinetobacter_baumannii
GCF_009857705.1	Acinetobacter_baumannii
GCF_009857695.1	Acinetobacter_baumannii
GCF_009833005.1	Acinetobacter_baumannii
GCF_000453025.1	Acinetobacter_baumannii
GCF_000453045.1	Acinetobacter_baumannii
GCF_000453105.1	Acinetobacter_baumannii
GCF_000453165.1	Acinetobacter_baumannii
GCF_000453185.1	Acinetobacter_baumannii
GCF_000453325.1	Acinetobacter_baumannii
GCF_000453445.1	Acinetobacter_baumannii
GCF_000453465.1	Acinetobacter_baumannii
GCF_000453605.1	Acinetobacter_baumannii
GCF_000453625.1	Acinetobacter_baumannii
GCF_000453725.1	Acinetobacter_baumannii
GCF_000453745.1	Acinetobacter_baumannii
GCF_000453805.1	Acinetobacter_baumannii
GCF_000453825.1	Acinetobacter_baumannii
GCF_000453885.1	Acinetobacter_baumannii
GCF_000453905.1	Acinetobacter_baumannii
GCF_010178615.1	Acinetobacter_baumannii
GCF_010499755.1	Acinetobacter_baumannii
GCF_010178735.1	Acinetobacter_baumannii
GCF_010178795.1	Acinetobacter_baumannii
GCF_010499635.1	Acinetobacter_baumannii
GCF_000417785.2	Acinetobacter_baumannii
GCF_010179575.1	Acinetobacter_baumannii
GCF_010179525.1	Acinetobacter_baumannii
GCA_900496205.1	Acinetobacter_baumannii	set([2016.0])	set(['Thailand'])	set(['Human'])
GCA_900495765.1	Acinetobacter_baumannii	set([2016.0])	set(['Thailand'])	set(['Human'])
GCA_900493605.1	Acinetobacter_baumannii	set([2016.0])	set(['Thailand'])	set(['Human'])
GCA_900493585.1	Acinetobacter_baumannii	set([2016.0])	set(['Thailand'])	set(['Human'])
GCF_010179495.1	Acinetobacter_baumannii
GCF_010179395.1	Acinetobacter_baumannii
GCF_010179385.1	Acinetobacter_baumannii
GCF_010179355.1	Acinetobacter_baumannii
GCF_010179295.1	Acinetobacter_baumannii
GCF_010179145.1	Acinetobacter_baumannii
GCF_010179135.1	Acinetobacter_baumannii
GCF_010179075.1	Acinetobacter_baumannii
GCF_010179065.1	Acinetobacter_baumannii
GCF_000419385.1	Acinetobacter_baumannii
GCF_000419405.1	Acinetobacter_baumannii
GCF_010179035.1	Acinetobacter_baumannii
GCF_010178915.1	Acinetobacter_baumannii
GCF_010178895.1	Acinetobacter_baumannii
GCF_010178855.1	Acinetobacter_baumannii
GCF_010178835.1	Acinetobacter_baumannii
GCF_010178825.1	Acinetobacter_baumannii
GCF_010178765.1	Acinetobacter_baumannii
GCA_003185755.1	Acinetobacter_baumannii	set([2012.0])	set(['Croatia'])	set(['Human'])
GCA_003843775.1	Acinetobacter_baumannii	set([2012.0])	set(['South Korea'])	set(['Human'])
GCF_000810045.3	Acinetobacter_baumannii
GCA_001535665.1	Acinetobacter_baumannii	set([2014.0])	set(['India'])	set(['Human'])
GCF_002148745.1	Acinetobacter_baumannii
GCF_002148735.1	Acinetobacter_baumannii
GCF_002145395.1	Acinetobacter_baumannii
GCF_002145295.1	Acinetobacter_baumannii
GCF_002145255.1	Acinetobacter_baumannii
GCF_002145195.1	Acinetobacter_baumannii
GCF_002145155.1	Acinetobacter_baumannii
GCF_002145065.1	Acinetobacter_baumannii
GCF_002144995.1	Acinetobacter_baumannii
GCA_001535685.1	Acinetobacter_baumannii	set([2014.0])	set(['India'])	set(['Human'])
GCF_002144955.1	Acinetobacter_baumannii
GCF_002144795.1	Acinetobacter_baumannii
GCF_002143955.1	Acinetobacter_baumannii
GCF_002143885.1	Acinetobacter_baumannii
GCF_002143875.1	Acinetobacter_baumannii
GCF_002143855.1	Acinetobacter_baumannii
GCF_002143795.1	Acinetobacter_baumannii
GCF_002143605.1	Acinetobacter_baumannii
GCF_002143335.1	Acinetobacter_baumannii
GCF_002143235.1	Acinetobacter_baumannii
GCF_002143185.1	Acinetobacter_baumannii
GCF_002144805.1	Acinetobacter_baumannii
GCF_002182385.1	Acinetobacter_baumannii
GCF_002182615.1	Acinetobacter_baumannii
GCF_002182685.1	Acinetobacter_baumannii
GCF_002212565.1	Acinetobacter_baumannii
GCF_002212525.1	Acinetobacter_baumannii
GCF_002212485.1	Acinetobacter_baumannii
GCF_002212465.1	Acinetobacter_baumannii
GCF_002212365.1	Acinetobacter_baumannii
GCF_002212325.1	Acinetobacter_baumannii
GCF_002212285.1	Acinetobacter_baumannii
GCF_002212245.1	Acinetobacter_baumannii
GCA_001584485.1	Acinetobacter_baumannii	set([2012.0])	set(['Germany'])	set(['Human'])
GCA_001584475.1	Acinetobacter_baumannii	set([2012.0])	set(['Germany'])	set(['Human'])
GCA_001584465.1	Acinetobacter_baumannii	set([2012.0])	set(['Germany'])	set(['Human'])
GCF_002212165.1	Acinetobacter_baumannii
GCF_002212105.1	Acinetobacter_baumannii
GCF_002197745.1	Acinetobacter_baumannii
GCF_002184335.1	Acinetobacter_baumannii
GCF_002183735.1	Acinetobacter_baumannii
GCF_002183515.1	Acinetobacter_baumannii
GCF_002183435.1	Acinetobacter_baumannii
GCF_002183275.1	Acinetobacter_baumannii
GCF_002183105.1	Acinetobacter_baumannii
GCF_002183045.1	Acinetobacter_baumannii
GCF_002183025.1	Acinetobacter_baumannii
GCF_002182945.1	Acinetobacter_baumannii
GCF_002142735.1	Acinetobacter_baumannii
GCF_002212605.1	Acinetobacter_baumannii
GCF_002138215.1	Acinetobacter_baumannii
GCA_001420405.1	Acinetobacter_baumannii
GCF_001414575.1	Acinetobacter_baumannii	set([2008.0])	set(['USA'])	set(['Human'])
GCF_001414655.1	Acinetobacter_baumannii	set([2008.0])	set(['USA'])	set(['Human'])
GCF_001414685.1	Acinetobacter_baumannii	set([2008.0])	set(['USA'])	set(['Human'])
GCF_001414735.1	Acinetobacter_baumannii	set([2008.0])	set(['USA'])	set(['Human'])
GCF_001414765.1	Acinetobacter_baumannii	set([2008.0])	set(['USA'])	set(['Human'])
GCF_001414815.1	Acinetobacter_baumannii	set([2008.0])	set(['USA'])	set(['Human'])
GCF_001414865.1	Acinetobacter_baumannii	set([2008.0])	set(['USA'])	set(['Human'])
GCF_001414915.1	Acinetobacter_baumannii	set([2008.0])	set(['USA'])	set(['Human'])
GCF_001414985.1	Acinetobacter_baumannii	set([2007.0])	set(['USA'])	set(['Human'])
GCF_001415065.1	Acinetobacter_baumannii	set([2009.0])	set(['USA'])	set(['Human'])
GCF_001414565.1	Acinetobacter_baumannii	set([2008.0])	set(['USA'])	set(['Human'])
GCF_001415085.1	Acinetobacter_baumannii	set([2009.0])	set(['USA'])	set(['Human'])
GCF_001415535.1	Acinetobacter_baumannii	set([2009.0])	set(['USA'])	set(['Human'])
GCF_001415665.1	Acinetobacter_baumannii	set([2010.0])	set(['USA'])	set(['Human'])
GCF_001415965.1	Acinetobacter_baumannii	set([2010.0])	set(['USA'])	set(['Human'])
GCF_001415985.1	Acinetobacter_baumannii	set([2010.0])	set(['USA'])	set(['Human'])
GCF_001416015.1	Acinetobacter_baumannii	set([2010.0])	set(['USA'])	set(['Human'])
GCF_001416095.1	Acinetobacter_baumannii	set([2011.0])	set(['USA'])	set(['Human'])
GCA_000968965.1	Acinetobacter_baumannii	set([2008.0])	set(['Hong Kong'])	set(['Human'])
GCF_001416355.1	Acinetobacter_baumannii	set([2013.0])	set(['USA'])	set(['Human'])
GCF_001416475.1	Acinetobacter_baumannii	set([])	set(['USA'])	set(['Human'])
GCF_001416515.1	Acinetobacter_baumannii	set([2012.0])	set(['USA'])	set(['Human'])
GCF_001415435.1	Acinetobacter_baumannii	set([2009.0])	set(['USA'])	set(['Human'])
GCF_001400975.1	Acinetobacter_baumannii	set([2015.0])	set(['France'])	set(['Human'])
GCF_001399655.1	Acinetobacter_baumannii
GCF_002119265.1	Acinetobacter_baumannii
GCA_001420385.1	Acinetobacter_baumannii
GCA_001420335.1	Acinetobacter_baumannii
GCA_001420305.1	Acinetobacter_baumannii
GCF_002138055.1	Acinetobacter_baumannii
GCF_002138035.1	Acinetobacter_baumannii
GCF_002137955.1	Acinetobacter_baumannii
GCF_002137945.1	Acinetobacter_baumannii
GCF_002137895.1	Acinetobacter_baumannii
GCF_002137775.1	Acinetobacter_baumannii
GCF_002137755.1	Acinetobacter_baumannii
GCF_002137725.1	Acinetobacter_baumannii
GCF_002137575.1	Acinetobacter_baumannii
GCF_002137265.1	Acinetobacter_baumannii
GCF_002137255.1	Acinetobacter_baumannii
GCF_002137185.1	Acinetobacter_baumannii
GCF_002136995.1	Acinetobacter_baumannii
GCF_002136955.1	Acinetobacter_baumannii
GCF_002136815.1	Acinetobacter_baumannii
GCF_002136735.1	Acinetobacter_baumannii
GCF_002136685.1	Acinetobacter_baumannii
GCF_002136675.1	Acinetobacter_baumannii
GCF_002136655.1	Acinetobacter_baumannii
GCF_002136595.1	Acinetobacter_baumannii
GCF_002138105.1	Acinetobacter_baumannii
GCF_002212645.1	Acinetobacter_baumannii
GCF_002212685.1	Acinetobacter_baumannii
GCF_002212705.1	Acinetobacter_baumannii
GCF_002950425.1	Acinetobacter_baumannii
GCF_002948925.1	Acinetobacter_baumannii
GCF_002947845.1	Acinetobacter_baumannii
GCA_002009115.1	Acinetobacter_baumannii	set([2015.0])	set([])	set(['Human'])
GCF_002928155.1	Acinetobacter_baumannii
GCF_002928145.1	Acinetobacter_baumannii
GCF_002928075.1	Acinetobacter_baumannii
GCF_002928045.1	Acinetobacter_baumannii
GCF_002928035.1	Acinetobacter_baumannii
GCF_002928015.1	Acinetobacter_baumannii
GCF_002950435.1	Acinetobacter_baumannii
GCF_002927995.1	Acinetobacter_baumannii
GCF_002927915.1	Acinetobacter_baumannii
GCF_002927895.1	Acinetobacter_baumannii
GCF_002922935.1	Acinetobacter_baumannii
GCF_002919905.1	Acinetobacter_baumannii
GCF_002902885.1	Acinetobacter_baumannii
GCF_002899995.1	Acinetobacter_baumannii
GCF_002885855.1	Acinetobacter_baumannii
GCF_002863545.1	Acinetobacter_baumannii
GCF_002838025.2	Acinetobacter_baumannii
GCF_002838015.2	Acinetobacter_baumannii
GCF_002927965.1	Acinetobacter_baumannii
GCF_002950515.1	Acinetobacter_baumannii
GCF_002950525.1	Acinetobacter_baumannii
GCF_002950725.1	Acinetobacter_baumannii
GCF_002992505.1	Acinetobacter_baumannii
GCF_002992485.1	Acinetobacter_baumannii
GCF_002992465.1	Acinetobacter_baumannii
GCF_002992445.1	Acinetobacter_baumannii
GCF_002992425.1	Acinetobacter_baumannii
GCF_002992405.1	Acinetobacter_baumannii
GCF_002992385.1	Acinetobacter_baumannii
GCF_002992345.1	Acinetobacter_baumannii
GCF_002992325.1	Acinetobacter_baumannii
GCF_002992305.1	Acinetobacter_baumannii
GCF_002992285.1	Acinetobacter_baumannii
GCF_002992255.1	Acinetobacter_baumannii
GCF_002992235.1	Acinetobacter_baumannii
GCF_002992225.1	Acinetobacter_baumannii
GCF_002992205.1	Acinetobacter_baumannii
GCF_002951435.1	Acinetobacter_baumannii
GCF_002951335.1	Acinetobacter_baumannii
GCF_002951235.1	Acinetobacter_baumannii
GCF_002951215.1	Acinetobacter_baumannii
GCF_002951095.1	Acinetobacter_baumannii
GCF_002951075.1	Acinetobacter_baumannii
GCF_002951055.1	Acinetobacter_baumannii
GCF_002950815.1	Acinetobacter_baumannii
GCF_002837945.2	Acinetobacter_baumannii
GCF_002837895.2	Acinetobacter_baumannii
GCF_002837885.2	Acinetobacter_baumannii
GCF_002803655.2	Acinetobacter_baumannii
GCF_002416475.1	Acinetobacter_baumannii
GCF_002416435.1	Acinetobacter_baumannii
GCF_002416375.1	Acinetobacter_baumannii
GCF_002416345.1	Acinetobacter_baumannii
GCF_002411775.1	Acinetobacter_baumannii
GCF_002367895.1	Acinetobacter_baumannii
GCF_002277655.1	Acinetobacter_baumannii
GCF_002277385.1	Acinetobacter_baumannii
GCF_002277365.1	Acinetobacter_baumannii
GCF_000809965.3	Acinetobacter_baumannii
GCF_002277215.1	Acinetobacter_baumannii
GCF_002265555.1	Acinetobacter_baumannii
GCF_002250465.1	Acinetobacter_baumannii
GCF_002249475.1	Acinetobacter_baumannii
GCF_002249405.1	Acinetobacter_baumannii
GCF_002249255.1	Acinetobacter_baumannii
GCF_002245665.1	Acinetobacter_baumannii
GCF_002245595.1	Acinetobacter_baumannii
GCF_002241095.1	Acinetobacter_baumannii
GCF_002239885.1	Acinetobacter_baumannii
GCA_001628795.1	Acinetobacter_baumannii	set([2010.0])	set(['Spain'])	set(['Human'])
GCF_002239865.1	Acinetobacter_baumannii
GCF_001373535.1	Acinetobacter_baumannii	set([2005.0])	set(['India'])	set([])
GCF_002504145.1	Acinetobacter_baumannii
GCF_001420505.1	Acinetobacter_baumannii	set([])	set(['South Africa'])	set(['Human'])
GCF_001276055.1	Acinetobacter_baumannii	set([2014.0])	set(['India'])	set([])
GCF_002573725.1	Acinetobacter_baumannii
GCF_002803025.2	Acinetobacter_baumannii
GCF_002762535.1	Acinetobacter_baumannii
GCF_002762505.1	Acinetobacter_baumannii
GCF_002762495.1	Acinetobacter_baumannii
GCA_001863235.1	Acinetobacter_baumannii
GCA_001862585.1	Acinetobacter_baumannii
GCA_001861565.1	Acinetobacter_baumannii
GCA_001861385.1	Acinetobacter_baumannii
GCF_002762095.1	Acinetobacter_baumannii
GCF_002760695.1	Acinetobacter_baumannii
GCF_002753915.1	Acinetobacter_baumannii
GCF_002741415.1	Acinetobacter_baumannii
GCF_002727055.2	Acinetobacter_baumannii
GCF_002724085.1	Acinetobacter_baumannii
GCF_002634345.1	Acinetobacter_baumannii
GCF_002573915.1	Acinetobacter_baumannii
GCF_002573905.1	Acinetobacter_baumannii
GCF_002573895.1	Acinetobacter_baumannii
GCF_002573875.1	Acinetobacter_baumannii
GCF_002573825.1	Acinetobacter_baumannii
GCF_002573815.1	Acinetobacter_baumannii
GCF_002573795.1	Acinetobacter_baumannii
GCF_002573735.1	Acinetobacter_baumannii
GCF_001261895.2	Acinetobacter_baumannii	set([2013.0])	set([])	set([])
GCF_002992565.1	Acinetobacter_baumannii
GCF_001432265.1	Acinetobacter_baumannii	set([2012.0])	set(['Lebanon'])	set(['Human'])
GCF_001432385.1	Acinetobacter_baumannii	set([2005.0])	set(['USA'])	set(['Human'])
GCF_001862385.1	Acinetobacter_baumannii	set([2013.0])	set(['China'])	set(['Human'])
GCF_001862375.1	Acinetobacter_baumannii	set([2014.0])	set(['China'])	set(['Human'])
GCF_001862345.1	Acinetobacter_baumannii	set([2014.0])	set(['China'])	set(['Human'])
GCF_001862335.1	Acinetobacter_baumannii	set([2014.0])	set(['China'])	set(['Human'])
GCF_001862305.1	Acinetobacter_baumannii	set([2014.0])	set(['China'])	set(['Human'])
GCF_001862265.1	Acinetobacter_baumannii	set([2013.0])	set(['China'])	set(['Human'])
GCF_001862215.1	Acinetobacter_baumannii	set([2014.0])	set(['China'])	set(['Human'])
GCF_001862175.1	Acinetobacter_baumannii	set([2014.0])	set(['China'])	set(['Human'])
GCF_001862135.1	Acinetobacter_baumannii	set([2013.0])	set(['China'])	set(['Human'])
GCF_001862005.1	Acinetobacter_baumannii	set([2013.0])	set(['China'])	set(['Human'])
GCF_001862725.1	Acinetobacter_baumannii	set([2014.0])	set(['China'])	set(['Human'])
GCA_000372585.2	Acinetobacter_baumannii
GCF_001861745.1	Acinetobacter_baumannii	set([2013.0])	set(['China'])	set(['Human'])
GCF_001648035.1	Acinetobacter_baumannii	set([])	set(['Estonia'])	set(['Human'])
GCF_001861615.1	Acinetobacter_baumannii	set([2014.0])	set(['China'])	set(['Human'])
GCF_001861585.1	Acinetobacter_baumannii	set([2014.0])	set(['China'])	set(['Human'])
GCF_001861545.1	Acinetobacter_baumannii	set([2013.0])	set(['China'])	set(['Human'])
GCF_001861515.1	Acinetobacter_baumannii	set([2014.0])	set(['China'])	set(['Human'])
GCF_001861395.1	Acinetobacter_baumannii	set([2014.0])	set(['China'])	set(['Human'])
GCF_001861375.1	Acinetobacter_baumannii	set([2014.0])	set(['China'])	set(['Human'])
GCA_000307975.2	Acinetobacter_baumannii	set([2011.0])	set(['Malaysia'])	set(['Human'])
GCF_001806485.1	Acinetobacter_baumannii	set([2015.0])	set(['South Korea'])	set(['Human'])
GCF_001861935.1	Acinetobacter_baumannii
GCF_001862775.1	Acinetobacter_baumannii	set([2014.0])	set(['China'])	set(['Human'])
GCF_001862795.1	Acinetobacter_baumannii	set([2014.0])	set(['China'])	set(['Human'])
GCF_001862805.1	Acinetobacter_baumannii	set([2013.0])	set(['China'])	set(['Human'])
GCF_001864665.1	Acinetobacter_baumannii	set([2013.0])	set(['China'])	set(['Human'])
GCF_001864655.1	Acinetobacter_baumannii	set([2013.0])	set(['China'])	set(['Human'])
GCF_001864635.1	Acinetobacter_baumannii	set([2014.0])	set(['China'])	set(['Human'])
GCF_001864575.1	Acinetobacter_baumannii	set([2013.0])	set(['China'])	set(['Human'])
GCF_001864535.1	Acinetobacter_baumannii	set([2012.0])	set(['China'])	set(['Human'])
GCF_001864045.1	Acinetobacter_baumannii	set([2015.0])	set(['China'])	set(['Human'])
GCF_001863975.1	Acinetobacter_baumannii	set([2014.0])	set(['China'])	set(['Human'])
GCF_001863865.1	Acinetobacter_baumannii	set([2015.0])	set(['China'])	set(['Human'])
GCF_001863785.1	Acinetobacter_baumannii	set([2014.0])	set(['China'])	set(['Human'])
GCF_001863725.1	Acinetobacter_baumannii	set([2014.0])	set(['China'])	set(['Human'])
GCF_001863705.1	Acinetobacter_baumannii
GCF_001863575.1	Acinetobacter_baumannii	set([2014.0])	set(['China'])	set(['Human'])
GCF_001863415.1	Acinetobacter_baumannii	set([2014.0])	set(['China'])	set(['Human'])
GCA_000464705.1	Acinetobacter_baumannii	set([])	set([])	set(['Human'])
GCF_001863335.1	Acinetobacter_baumannii	set([2014.0])	set(['China'])	set(['Human'])
GCF_001863315.1	Acinetobacter_baumannii
GCF_001863295.1	Acinetobacter_baumannii	set([2014.0])	set(['China'])	set(['Human'])
GCF_001863275.1	Acinetobacter_baumannii	set([2013.0])	set(['China'])	set(['Human'])
GCF_001863205.1	Acinetobacter_baumannii	set([2014.0])	set(['China'])	set(['Human'])
GCF_001863145.1	Acinetobacter_baumannii
GCF_001862895.1	Acinetobacter_baumannii	set([2013.0])	set(['China'])	set(['Human'])
GCF_001862855.1	Acinetobacter_baumannii	set([2013.0])	set(['China'])	set(['Human'])
GCF_001862825.1	Acinetobacter_baumannii	set([2012.0])	set(['China'])	set(['Human'])
GCF_001806425.1	Acinetobacter_baumannii	set([2015.0])	set(['South Korea'])	set(['Human'])
GCF_001864745.1	Acinetobacter_baumannii	set([2013.0])	set(['China'])	set(['Human'])
GCF_001664645.1	Acinetobacter_baumannii	set([2012.0])	set([])	set(['Human'])
GCF_001664735.1	Acinetobacter_baumannii	set([2014.0])	set([])	set(['Human'])
GCF_001674765.1	Acinetobacter_baumannii	set([2016.0])	set([])	set(['Human'])
GCF_001674785.1	Acinetobacter_baumannii	set([2016.0])	set([])	set(['Human'])
GCF_001674885.1	Acinetobacter_baumannii	set([2016.0])	set([])	set(['Human'])
GCF_001675265.1	Acinetobacter_baumannii	set([2002.0])	set(['Russia'])	set(['Human'])
GCF_001680185.1	Acinetobacter_baumannii	set([2013.0])	set(['China'])	set(['Human'])
GCF_001680225.1	Acinetobacter_baumannii	set([2014.0])	set(['China'])	set(['Human'])
GCF_001680265.1	Acinetobacter_baumannii	set([2013.0])	set(['China'])	set(['Human'])
GCF_001680295.1	Acinetobacter_baumannii	set([2014.0])	set(['China'])	set(['Human'])
GCF_001680475.1	Acinetobacter_baumannii	set([2014.0])	set(['China'])	set(['Human'])
GCF_001721705.1	Acinetobacter_baumannii
GCA_000241665.2	Acinetobacter_baumannii	set([2009.0])	set(['USA'])	set(['Human'])
GCF_001721455.1	Acinetobacter_baumannii	set([2014.0])	set(['China'])	set([])
GCF_001700445.1	Acinetobacter_baumannii	set([2013.0])	set(['USA'])	set(['Human'])
GCF_001707985.1	Acinetobacter_baumannii	set([2010.0])	set(['Spain'])	set(['Human'])
GCA_000189735.2	Acinetobacter_baumannii	set([2008.0])	set([])	set([])
GCF_902705255.1	Acinetobacter_baumannii
GCF_902705325.1	Acinetobacter_baumannii
GCF_902705335.1	Acinetobacter_baumannii
GCF_902705405.1	Acinetobacter_baumannii
GCA_000015425.1	Acinetobacter_baumannii	set([1951.0])	set([])	set([])
GCF_902705485.1	Acinetobacter_baumannii
GCF_902705505.1	Acinetobacter_baumannii
GCF_001721365.1	Acinetobacter_baumannii	set([2014.0])	set(['China'])	set([])
GCF_001674735.1	Acinetobacter_baumannii	set([2015.0])	set([])	set(['Human'])
GCF_001674695.1	Acinetobacter_baumannii	set([2014.0])	set([])	set(['Human'])
GCF_001674655.1	Acinetobacter_baumannii	set([2014.0])	set([])	set(['Human'])
GCF_001664805.1	Acinetobacter_baumannii	set([2014.0])	set([])	set(['Human'])
GCF_001664815.1	Acinetobacter_baumannii	set([2015.0])	set([])	set(['Human'])
GCA_000282795.3	Acinetobacter_baumannii	set([2011.0])	set(['Malaysia'])	set(['Human'])
GCF_001664895.1	Acinetobacter_baumannii	set([2015.0])	set([])	set(['Human'])
GCF_001664985.1	Acinetobacter_baumannii	set([2015.0])	set([])	set(['Human'])
GCF_001666475.1	Acinetobacter_baumannii	set([2014.0])	set([])	set(['Human'])
GCF_001668815.1	Acinetobacter_baumannii	set([2014.0])	set([])	set(['Human'])
GCF_001669035.1	Acinetobacter_baumannii	set([2014.0])	set([])	set(['Human'])
GCF_001669225.1	Acinetobacter_baumannii	set([2014.0])	set([])	set(['Human'])
GCF_001669265.1	Acinetobacter_baumannii	set([2014.0])	set([])	set(['Human'])
GCF_001669535.1	Acinetobacter_baumannii	set([2014.0])	set([])	set(['Human'])
GCF_001669735.1	Acinetobacter_baumannii	set([2014.0])	set(['Malaysia'])	set(['Human'])
GCF_001672535.1	Acinetobacter_baumannii
GCF_001673875.1	Acinetobacter_baumannii	set([2014.0])	set([])	set(['Human'])
GCF_001673895.1	Acinetobacter_baumannii	set([2015.0])	set([])	set(['Human'])
GCF_001674035.1	Acinetobacter_baumannii	set([2016.0])	set([])	set(['Human'])
GCF_001674085.1	Acinetobacter_baumannii	set([2014.0])	set([])	set(['Human'])
GCF_001674165.1	Acinetobacter_baumannii	set([2014.0])	set([])	set(['Human'])
GCF_001674185.1	Acinetobacter_baumannii	set([2015.0])	set([])	set(['Human'])
GCF_001674295.1	Acinetobacter_baumannii	set([2014.0])	set([])	set(['Human'])
GCF_001674365.1	Acinetobacter_baumannii	set([2015.0])	set([])	set(['Human'])
GCF_001674395.1	Acinetobacter_baumannii	set([2014.0])	set([])	set(['Human'])
GCF_001674485.1	Acinetobacter_baumannii	set([2015.0])	set([])	set(['Human'])
GCF_001664665.1	Acinetobacter_baumannii	set([2015.0])	set([])	set(['Human'])
GCF_001864815.1	Acinetobacter_baumannii	set([2014.0])	set(['China'])	set(['Human'])
GCF_001640075.1	Acinetobacter_baumannii	set([2012.0])	set(['Saudi Arabia'])	set(['Human'])
GCF_001874685.1	Acinetobacter_baumannii	set([])	set([])	set([])
GCF_002082745.1	Acinetobacter_baumannii
GCF_002082725.1	Acinetobacter_baumannii
GCF_002082705.1	Acinetobacter_baumannii
GCF_002082685.1	Acinetobacter_baumannii
GCF_002072795.1	Acinetobacter_baumannii
GCF_002017805.1	Acinetobacter_baumannii	set([2011.0])	set(['USA'])	set(['Human'])
GCF_002017525.1	Acinetobacter_baumannii	set([2011.0])	set(['USA'])	set(['Human'])
GCF_002017515.1	Acinetobacter_baumannii	set([2011.0])	set(['USA'])	set(['Human'])
GCF_002017115.1	Acinetobacter_baumannii	set([2012.0])	set(['USA'])	set(['Human'])
GCF_002017035.1	Acinetobacter_baumannii	set([2012.0])	set(['USA'])	set(['Human'])
GCF_002082785.1	Acinetobacter_baumannii
GCF_002016865.1	Acinetobacter_baumannii	set([2013.0])	set(['USA'])	set(['Human'])
GCF_002014325.1	Acinetobacter_baumannii	set([2009.0])	set(['USA'])	set(['Human'])
GCF_002014315.1	Acinetobacter_baumannii	set([2009.0])	set(['USA'])	set(['Human'])
GCF_002014275.1	Acinetobacter_baumannii	set([2013.0])	set(['USA'])	set(['Human'])
GCF_002014155.1	Acinetobacter_baumannii	set([2009.0])	set(['USA'])	set(['Human'])
GCF_002014105.1	Acinetobacter_baumannii	set([2009.0])	set(['USA'])	set(['Human'])
GCF_001457535.1	Acinetobacter_baumannii	set([1950.0])	set([])	set([])
GCF_001997285.1	Acinetobacter_baumannii	set([])	set([])	set([])
GCF_001500225.1	Acinetobacter_baumannii	set([2003.0])	set(['Brazil'])	set(['Human'])
GCF_001511855.1	Acinetobacter_baumannii	set([1999.0])	set(['Australia'])	set([])
GCF_001511875.1	Acinetobacter_baumannii	set([1995.0])	set(['Australia'])	set([])
GCF_002014475.1	Acinetobacter_baumannii	set([2013.0])	set(['USA'])	set(['Human'])
GCF_002082805.1	Acinetobacter_baumannii
GCF_002082825.1	Acinetobacter_baumannii
GCF_002082845.1	Acinetobacter_baumannii
GCF_001432425.1	Acinetobacter_baumannii	set([2005.0])	set(['USA'])	set(['Human'])
GCF_001432445.1	Acinetobacter_baumannii	set([2005.0])	set(['USA'])	set(['Human'])
GCF_001432535.1	Acinetobacter_baumannii	set([2006.0])	set(['USA'])	set(['Human'])
GCF_001432545.1	Acinetobacter_baumannii	set([2005.0])	set(['USA'])	set(['Human'])
GCF_001432585.1	Acinetobacter_baumannii	set([2006.0])	set(['USA'])	set(['Human'])
GCF_001432595.1	Acinetobacter_baumannii	set([2006.0])	set(['USA'])	set(['Human'])
GCF_001432665.1	Acinetobacter_baumannii	set([2006.0])	set(['USA'])	set(['Human'])
GCF_001432685.1	Acinetobacter_baumannii	set([2005.0])	set(['USA'])	set(['Human'])
GCF_001432925.1	Acinetobacter_baumannii	set([2006.0])	set(['USA'])	set(['Human'])
GCF_001433005.1	Acinetobacter_baumannii	set([2007.0])	set(['USA'])	set(['Human'])
GCF_001433015.1	Acinetobacter_baumannii	set([2007.0])	set(['USA'])	set(['Human'])
GCF_001433145.1	Acinetobacter_baumannii	set([2007.0])	set(['USA'])	set(['Human'])
GCF_001433265.1	Acinetobacter_baumannii	set([2007.0])	set(['USA'])	set(['Human'])
GCF_001433275.1	Acinetobacter_baumannii	set([2007.0])	set(['USA'])	set(['Human'])
GCF_001433335.1	Acinetobacter_baumannii	set([2008.0])	set(['USA'])	set(['Human'])
GCF_001433655.1	Acinetobacter_baumannii	set([2007.0])	set(['USA'])	set(['Human'])
GCF_001433695.1	Acinetobacter_baumannii	set([2008.0])	set(['USA'])	set(['Human'])
GCF_001441485.1	Acinetobacter_baumannii	set([2011.0])	set(['USA'])	set(['Human'])
GCF_001441545.1	Acinetobacter_baumannii	set([2003.0])	set(['USA'])	set(['Human'])
GCF_001444225.1	Acinetobacter_baumannii	set([2011.0])	set(['USA'])	set(['Human'])
GCF_001444265.1	Acinetobacter_baumannii	set([2012.0])	set(['USA'])	set(['Human'])
GCF_001446715.1	Acinetobacter_baumannii	set([2014.0])	set(['USA'])	set(['Cow'])
GCF_002093815.1	Acinetobacter_baumannii
GCF_001511915.1	Acinetobacter_baumannii	set([2010.0])	set(['Australia'])	set([])
GCF_001511935.1	Acinetobacter_baumannii	set([2008.0])	set(['Australia'])	set([])
GCF_001512055.1	Acinetobacter_baumannii	set([2002.0])	set(['Greece'])	set([])
GCF_001512075.1	Acinetobacter_baumannii	set([2002.0])	set(['Australia'])	set([])
GCF_001922425.2	Acinetobacter_baumannii
GCF_001922205.1	Acinetobacter_baumannii	set([])	set(['USA'])	set(['Human'])
GCF_001573125.1	Acinetobacter_baumannii	set([2010.0])	set(['China'])	set(['Human'])
GCF_001578145.1	Acinetobacter_baumannii	set([2010.0])	set(['China'])	set(['Human'])
GCA_000509305.1	Acinetobacter_baumannii	set([2008.0])	set(['Japan'])	set([])
GCF_001910675.1	Acinetobacter_baumannii	set([2016.0])	set(['Lebanon'])	set(['Human'])
GCF_001909135.1	Acinetobacter_baumannii	set([2013.0])	set(['India'])	set(['Human'])
GCF_001907155.1	Acinetobacter_baumannii	set([2013.0])	set(['Croatia'])	set(['Human'])
GCF_001896005.1	Acinetobacter_baumannii	set([2009.0])	set(['Mexico'])	set(['Human'])
GCF_001895125.1	Acinetobacter_baumannii	set([2015.0])	set([])	set([])
GCF_001891205.1	Acinetobacter_baumannii	set([2014.0])	set(['Colombia'])	set(['Human'])
GCF_001887305.1	Acinetobacter_baumannii	set([2014.0])	set(['China'])	set(['Human'])
GCF_001611995.1	Acinetobacter_baumannii	set([2006.0])	set(['USA'])	set(['Human'])
GCF_001612025.1	Acinetobacter_baumannii	set([2003.0])	set(['USA'])	set(['Human'])
GCF_001612075.1	Acinetobacter_baumannii	set([2007.0])	set(['USA'])	set(['Human'])
GCF_001612095.1	Acinetobacter_baumannii	set([2007.0])	set(['USA'])	set(['Human'])
GCF_001612115.1	Acinetobacter_baumannii	set([2007.0])	set(['USA'])	set(['Human'])
GCF_001617835.1	Acinetobacter_baumannii	set([2014.0])	set(['China'])	set(['Human'])
GCF_001617885.1	Acinetobacter_baumannii	set([2014.0])	set(['China'])	set(['Human'])
GCF_001618125.1	Acinetobacter_baumannii	set([2012.0])	set(['USA'])	set(['Human'])
GCF_001624975.1	Acinetobacter_baumannii
GCF_001636235.1	Acinetobacter_baumannii	set([2008.0])	set(['Mexico'])	set(['Human'])
GCF_001874915.1	Acinetobacter_baumannii	set([])	set([])	set([])
GCA_000522525.1	Acinetobacter_baumannii	set([2008.0])	set(['USA'])	set(['Human'])
GCF_001432375.1	Acinetobacter_baumannii	set([2005.0])	set(['USA'])	set(['Human'])
GCF_001922635.1	Acinetobacter_baumannii	set([2012.0])	set(['Mexico'])	set(['Human'])
GCF_001922695.1	Acinetobacter_baumannii	set([2013.0])	set(['Mexico'])	set(['Human'])
GCA_000614705.1	Acinetobacter_baumannii	set([])	set([])	set([])
GCF_001512095.1	Acinetobacter_baumannii	set([2010.0])	set(['Australia'])	set([])
GCF_001512155.1	Acinetobacter_baumannii	set([2009.0])	set(['Australia'])	set([])
GCF_001512175.1	Acinetobacter_baumannii	set([2002.0])	set(['Australia'])	set([])
GCF_001512195.1	Acinetobacter_baumannii	set([2003.0])	set(['Australia'])	set([])
GCF_001512235.1	Acinetobacter_baumannii	set([2002.0])	set(['Australia'])	set([])
GCF_001512255.1	Acinetobacter_baumannii	set([1997.0])	set(['Australia'])	set([])
GCF_001516805.1	Acinetobacter_baumannii	set([2015.0])	set(['India'])	set([])
GCF_001517645.1	Acinetobacter_baumannii	set([2014.0])	set([])	set([])
GCF_001518715.1	Acinetobacter_baumannii	set([2009.0])	set(['USA'])	set(['Human'])
GCF_001531265.2	Acinetobacter_baumannii
GCF_001541045.2	Acinetobacter_baumannii
GCA_000584375.2	Acinetobacter_baumannii	set([2012.0])	set(['USA'])	set(['Human'])
GCF_001541425.1	Acinetobacter_baumannii	set([2011.0])	set(['Spain'])	set(['Human'])
GCF_001541455.1	Acinetobacter_baumannii	set([2011.0])	set(['Spain'])	set(['Human'])
GCF_001541525.1	Acinetobacter_baumannii	set([2011.0])	set(['Spain'])	set(['Human'])
GCF_001541695.1	Acinetobacter_baumannii	set([2011.0])	set(['Spain'])	set(['Human'])
GCF_001543995.1	Acinetobacter_baumannii	set([])	set([])	set([])
GCF_001549575.1	Acinetobacter_baumannii	set([2011.0])	set(['Mexico'])	set(['Human'])
GCF_001939665.1	Acinetobacter_baumannii	set([2015.0])	set(['India'])	set(['Human'])
GCF_001939605.1	Acinetobacter_baumannii
GCF_001936675.2	Acinetobacter_baumannii
GCF_001922705.1	Acinetobacter_baumannii	set([2011.0])	set(['Mexico'])	set(['Human'])
GCF_001922685.1	Acinetobacter_baumannii	set([2013.0])	set(['Mexico'])	set(['Human'])
GCF_002992585.1	Acinetobacter_baumannii
GCA_902713735.1	Acinetobacter_baumannii	set([2015.0])	set(['Morocco'])	set(['Human'])
GCF_003584455.1	Acinetobacter_baumannii
GCF_000811805.3	Acinetobacter_baumannii
GCF_000811725.3	Acinetobacter_baumannii
GCF_000811685.3	Acinetobacter_baumannii
GCF_000811405.3	Acinetobacter_baumannii
GCF_003516005.1	Acinetobacter_baumannii
GCF_001028305.1	Acinetobacter_baumannii	set([2011.0])	set(['USA'])	set(['Human'])
GCF_001028325.1	Acinetobacter_baumannii	set([2011.0])	set(['USA'])	set(['Human'])
GCF_000811105.3	Acinetobacter_baumannii
GCF_000811085.3	Acinetobacter_baumannii
GCF_000811015.3	Acinetobacter_baumannii
GCF_003522665.1	Acinetobacter_baumannii
GCF_000810995.3	Acinetobacter_baumannii
GCF_001055965.1	Acinetobacter_baumannii	set([])	set(['USA'])	set(['Human'])
GCF_000810945.3	Acinetobacter_baumannii
GCF_000810935.3	Acinetobacter_baumannii
GCF_000810915.3	Acinetobacter_baumannii
GCF_001077555.2	Acinetobacter_baumannii
GCF_901669935.1	Acinetobacter_baumannii
GCF_901669965.1	Acinetobacter_baumannii
GCF_901669975.1	Acinetobacter_baumannii
GCF_001077565.2	Acinetobacter_baumannii
GCF_001077655.1	Acinetobacter_baumannii	set([2012.0])	set(['Canada'])	set(['Human'])
GCF_001053755.1	Acinetobacter_baumannii	set([])	set(['USA'])	set(['Human'])
GCF_003522705.1	Acinetobacter_baumannii
GCF_003522845.1	Acinetobacter_baumannii
GCF_003522885.1	Acinetobacter_baumannii
GCF_001008125.1	Acinetobacter_baumannii	set([2013.0])	set(['Malaysia'])	set([])
GCF_003627515.1	Acinetobacter_baumannii
GCF_003627465.1	Acinetobacter_baumannii
GCF_003627455.1	Acinetobacter_baumannii
GCF_003627405.1	Acinetobacter_baumannii
GCF_003596205.1	Acinetobacter_baumannii
GCF_003596165.1	Acinetobacter_baumannii
GCF_003596125.1	Acinetobacter_baumannii
GCF_003596075.1	Acinetobacter_baumannii
GCF_003596025.1	Acinetobacter_baumannii
GCF_003595985.1	Acinetobacter_baumannii
GCF_003595865.1	Acinetobacter_baumannii
GCF_003595815.1	Acinetobacter_baumannii
GCF_003595765.1	Acinetobacter_baumannii
GCF_003584515.1	Acinetobacter_baumannii
GCF_003584385.1	Acinetobacter_baumannii
GCF_003584315.1	Acinetobacter_baumannii
GCF_003584275.1	Acinetobacter_baumannii
GCF_003569645.1	Acinetobacter_baumannii
GCF_003569625.1	Acinetobacter_baumannii
GCF_000811905.3	Acinetobacter_baumannii
GCF_003569445.1	Acinetobacter_baumannii
GCF_003569425.1	Acinetobacter_baumannii
GCF_001077675.1	Acinetobacter_baumannii	set([2014.0])	set(['Canada'])	set(['Human'])
GCF_001077965.2	Acinetobacter_baumannii
GCF_003356965.1	Acinetobacter_baumannii
GCF_003356925.1	Acinetobacter_baumannii
GCF_003356155.1	Acinetobacter_baumannii
GCF_003356125.1	Acinetobacter_baumannii
GCF_003356105.1	Acinetobacter_baumannii
GCF_003356085.1	Acinetobacter_baumannii
GCF_003356045.1	Acinetobacter_baumannii
GCF_003356025.1	Acinetobacter_baumannii
GCF_003355995.1	Acinetobacter_baumannii
GCF_003355965.1	Acinetobacter_baumannii
GCF_003355945.1	Acinetobacter_baumannii
GCF_003355915.1	Acinetobacter_baumannii
GCF_003355885.1	Acinetobacter_baumannii
GCF_003355875.1	Acinetobacter_baumannii
GCF_003355845.1	Acinetobacter_baumannii
GCF_003355815.1	Acinetobacter_baumannii
GCF_003355785.1	Acinetobacter_baumannii
GCF_003355705.1	Acinetobacter_baumannii
GCF_003355675.1	Acinetobacter_baumannii
GCF_003355665.1	Acinetobacter_baumannii
GCF_003355605.1	Acinetobacter_baumannii
GCF_003355585.1	Acinetobacter_baumannii
GCF_003352735.1	Acinetobacter_baumannii
GCF_003352685.1	Acinetobacter_baumannii
GCF_000810625.2	Acinetobacter_baumannii
GCF_003356225.1	Acinetobacter_baumannii
GCF_001007815.1	Acinetobacter_baumannii	set([2007.0])	set(['Germany'])	set(['Human'])
GCA_002386695.1	Acinetobacter_baumannii	set([])	set(['USA'])	set([])
GCF_003356285.1	Acinetobacter_baumannii
GCF_000810905.3	Acinetobacter_baumannii
GCF_003948595.1	Acinetobacter_baumannii
GCF_003356815.1	Acinetobacter_baumannii
GCF_003356785.1	Acinetobacter_baumannii
GCF_003356765.1	Acinetobacter_baumannii
GCF_003356725.1	Acinetobacter_baumannii
GCF_003356705.1	Acinetobacter_baumannii
GCF_003356685.1	Acinetobacter_baumannii
GCF_003356645.1	Acinetobacter_baumannii
GCF_003356605.1	Acinetobacter_baumannii
GCF_003356575.1	Acinetobacter_baumannii
GCF_003356565.1	Acinetobacter_baumannii
GCF_000810685.3	Acinetobacter_baumannii
GCA_002389145.1	Acinetobacter_baumannii	set([])	set(['USA'])	set([])
GCF_003356535.1	Acinetobacter_baumannii
GCF_003356525.1	Acinetobacter_baumannii
GCF_003356505.1	Acinetobacter_baumannii
GCF_003356485.1	Acinetobacter_baumannii
GCF_003356455.1	Acinetobacter_baumannii
GCF_003356445.1	Acinetobacter_baumannii
GCF_003356405.1	Acinetobacter_baumannii
GCF_003356385.1	Acinetobacter_baumannii
GCF_003356365.1	Acinetobacter_baumannii
GCF_003356265.1	Acinetobacter_baumannii
GCF_001007775.1	Acinetobacter_baumannii	set([2011.0])	set(['Argentina'])	set(['Human'])
GCF_001007765.1	Acinetobacter_baumannii	set([2003.0])	set(['Greece'])	set(['Human'])
GCF_001007745.1	Acinetobacter_baumannii	set([2000.0])	set(['Netherlands'])	set(['Human'])
GCF_003953975.1	Acinetobacter_baumannii
GCF_003954005.1	Acinetobacter_baumannii
GCF_003954085.1	Acinetobacter_baumannii
GCF_003941815.1	Acinetobacter_baumannii
GCF_003941785.1	Acinetobacter_baumannii
GCF_003941715.1	Acinetobacter_baumannii
GCF_003941695.1	Acinetobacter_baumannii
GCF_003941645.1	Acinetobacter_baumannii
GCF_003941545.1	Acinetobacter_baumannii
GCA_002762545.2	Acinetobacter_baumannii
GCF_000835995.1	Acinetobacter_baumannii	set([])	set(['Japan'])	set([])
GCF_000836625.1	Acinetobacter_baumannii	set([1994.0])	set(['Argentina'])	set(['Human'])
GCF_003941505.1	Acinetobacter_baumannii
GCF_000876075.1	Acinetobacter_baumannii	set([])	set(['Japan'])	set([])
GCF_003941145.1	Acinetobacter_baumannii
GCF_003940895.1	Acinetobacter_baumannii
GCF_003954095.1	Acinetobacter_baumannii
GCF_003940365.1	Acinetobacter_baumannii
GCF_000876445.1	Acinetobacter_baumannii
GCF_003940105.1	Acinetobacter_baumannii
GCF_003940065.1	Acinetobacter_baumannii
GCF_003954115.1	Acinetobacter_baumannii
GCF_003954175.1	Acinetobacter_baumannii
GCF_003947855.1	Acinetobacter_baumannii
GCF_003940045.1	Acinetobacter_baumannii
GCF_000830055.1	Acinetobacter_baumannii
GCF_003949485.1	Acinetobacter_baumannii
GCF_003948545.1	Acinetobacter_baumannii
GCF_003948495.1	Acinetobacter_baumannii
GCF_003948465.1	Acinetobacter_baumannii
GCF_000828795.1	Acinetobacter_baumannii
GCF_000828935.1	Acinetobacter_baumannii
GCF_003948425.1	Acinetobacter_baumannii
GCF_003948415.1	Acinetobacter_baumannii
GCF_003948225.1	Acinetobacter_baumannii
GCF_003948695.1	Acinetobacter_baumannii
GCF_003948725.1	Acinetobacter_baumannii
GCF_003948775.1	Acinetobacter_baumannii
GCF_003948785.1	Acinetobacter_baumannii
GCF_003948835.1	Acinetobacter_baumannii
GCF_003948875.1	Acinetobacter_baumannii
GCF_003948895.1	Acinetobacter_baumannii
GCF_003948985.1	Acinetobacter_baumannii
GCF_003949095.1	Acinetobacter_baumannii
GCF_003949105.1	Acinetobacter_baumannii
GCF_003948125.1	Acinetobacter_baumannii
GCF_003949125.1	Acinetobacter_baumannii
GCF_003949235.1	Acinetobacter_baumannii
GCF_003949295.2	Acinetobacter_baumannii
GCF_003949335.1	Acinetobacter_baumannii
GCF_003949655.1	Acinetobacter_baumannii
GCF_003352675.1	Acinetobacter_baumannii
GCF_003939985.1	Acinetobacter_baumannii
GCF_003939645.1	Acinetobacter_baumannii
GCF_003711855.1	Acinetobacter_baumannii
GCF_003955355.1	Acinetobacter_baumannii
GCF_000951165.1	Acinetobacter_baumannii	set([2010.0])	set(['China'])	set(['Human'])
GCF_003697885.1	Acinetobacter_baumannii
GCF_901484905.1	Acinetobacter_baumannii
GCF_901484985.1	Acinetobacter_baumannii
GCF_000966305.1	Acinetobacter_baumannii	set([2007.0])	set(['Chile'])	set(['Human'])
GCF_000966505.1	Acinetobacter_baumannii	set([2009.0])	set(['Malaysia'])	set([])
GCF_000969285.1	Acinetobacter_baumannii	set([2009.0])	set(['Malaysia'])	set([])
GCF_000969295.1	Acinetobacter_baumannii	set([2010.0])	set(['Singapore'])	set([])
GCF_000969385.1	Acinetobacter_baumannii	set([2010.0])	set(['Singapore'])	set([])
GCA_003007285.1	Acinetobacter_baumannii	set([2013.0])	set(['China'])	set(['Human'])
GCA_003007315.1	Acinetobacter_baumannii	set([2012.0])	set(['China'])	set(['Human'])
GCF_000820685.1	Acinetobacter_baumannii	set([])	set([])	set(['Human'])
GCF_000969485.1	Acinetobacter_baumannii	set([2010.0])	set(['Singapore'])	set([])
GCA_003012895.2	Acinetobacter_baumannii
GCF_000820665.1	Acinetobacter_baumannii	set([])	set([])	set(['Human'])
GCF_000972525.1	Acinetobacter_baumannii	set([2011.0])	set(['USA'])	set([])
GCF_000981405.1	Acinetobacter_baumannii	set([])	set([])	set(['Human'])
GCF_000988155.1	Acinetobacter_baumannii	set([2009.0])	set(['Brazil'])	set(['Human'])
GCF_000814345.1	Acinetobacter_baumannii
GCF_001007685.1	Acinetobacter_baumannii	set([2002.0])	set(['Netherlands'])	set(['Human'])
GCF_001007725.1	Acinetobacter_baumannii	set([2008.0])	set(['United Arab Emirates'])	set(['Human'])
GCF_003711885.1	Acinetobacter_baumannii
GCF_003939655.1	Acinetobacter_baumannii
GCF_003711895.1	Acinetobacter_baumannii
GCF_003711945.1	Acinetobacter_baumannii
GCF_003939585.1	Acinetobacter_baumannii
GCF_003939565.1	Acinetobacter_baumannii
GCF_003939525.1	Acinetobacter_baumannii
GCF_003939505.1	Acinetobacter_baumannii
GCF_003939475.1	Acinetobacter_baumannii
GCF_003939465.1	Acinetobacter_baumannii
GCF_003954215.1	Acinetobacter_baumannii
GCF_003939445.1	Acinetobacter_baumannii
GCF_003939415.1	Acinetobacter_baumannii
GCF_003954275.1	Acinetobacter_baumannii
GCF_003954365.1	Acinetobacter_baumannii
GCF_003863935.1	Acinetobacter_baumannii
GCF_000939415.2	Acinetobacter_baumannii
GCF_003843745.1	Acinetobacter_baumannii
GCF_003843665.1	Acinetobacter_baumannii
GCF_003954795.1	Acinetobacter_baumannii
GCF_003812385.1	Acinetobacter_baumannii
GCF_003812065.1	Acinetobacter_baumannii
GCF_003721135.1	Acinetobacter_baumannii
GCF_000949165.2	Acinetobacter_baumannii	set([2012.0])	set(['USA'])	set(['Human'])
GCF_000949185.2	Acinetobacter_baumannii	set([2012.0])	set(['USA'])	set(['Human'])
GCF_000949195.2	Acinetobacter_baumannii	set([2008.0])	set(['USA'])	set(['Human'])
GCF_003711985.1	Acinetobacter_baumannii
GCF_003711905.1	Acinetobacter_baumannii
GCF_003352615.1	Acinetobacter_baumannii
GCF_003356845.1	Acinetobacter_baumannii
GCF_003948645.1	Acinetobacter_baumannii
GCF_003039075.1	Acinetobacter_baumannii
GCA_002364895.1	Acinetobacter_baumannii	set([])	set(['USA'])	set([])
GCF_003347325.1	Acinetobacter_baumannii
GCF_003347435.1	Acinetobacter_baumannii
GCF_003352485.1	Acinetobacter_baumannii
GCF_003006945.1	Acinetobacter_baumannii
GCF_003352525.1	Acinetobacter_baumannii
GCF_003039035.1	Acinetobacter_baumannii
GCF_003352535.1	Acinetobacter_baumannii
GCF_003352595.1	Acinetobacter_baumannii
GCF_003352605.1	Acinetobacter_baumannii
GCF_003345965.1	Acinetobacter_baumannii
GCF_003038965.1	Acinetobacter_baumannii
GCF_003020525.1	Acinetobacter_baumannii
GCF_003020455.1	Acinetobacter_baumannii
GCF_003020345.1	Acinetobacter_baumannii
GCF_003020275.1	Acinetobacter_baumannii
GCF_003020265.1	Acinetobacter_baumannii
GCF_003012695.1	Acinetobacter_baumannii
GCF_003006035.1	Acinetobacter_baumannii
GCF_003010675.1	Acinetobacter_baumannii
GCF_003130565.1	Acinetobacter_baumannii
GCF_003010655.1	Acinetobacter_baumannii
GCF_003007655.1	Acinetobacter_baumannii
GCF_003020575.1	Acinetobacter_baumannii
GCF_003345805.1	Acinetobacter_baumannii
GCF_003336155.1	Acinetobacter_baumannii
GCF_003336125.1	Acinetobacter_baumannii
GCF_003130905.1	Acinetobacter_baumannii
GCF_003130985.1	Acinetobacter_baumannii
GCF_003181015.1	Acinetobacter_baumannii
GCF_003240555.1	Acinetobacter_baumannii
GCF_003070905.1	Acinetobacter_baumannii
GCF_003057525.1	Acinetobacter_baumannii
GCF_003325575.1	Acinetobacter_baumannii
GCF_003325635.1	Acinetobacter_baumannii
GCF_003325665.1	Acinetobacter_baumannii
GCF_003056505.1	Acinetobacter_baumannii
GCF_003007015.1	Acinetobacter_baumannii
GCF_003332235.1	Acinetobacter_baumannii
GCF_003056475.1	Acinetobacter_baumannii
GCF_003056465.1	Acinetobacter_baumannii
GCF_003335945.1	Acinetobacter_baumannii
GCF_003335955.1	Acinetobacter_baumannii
GCF_003006995.1	Acinetobacter_baumannii
GCF_003336005.1	Acinetobacter_baumannii
GCF_000810305.3	Acinetobacter_baumannii
GCF_003336035.1	Acinetobacter_baumannii
GCF_003039375.1	Acinetobacter_baumannii
GCF_003039295.1	Acinetobacter_baumannii
GCF_003336045.1	Acinetobacter_baumannii
GCF_003336085.1	Acinetobacter_baumannii
GCF_003039215.1	Acinetobacter_baumannii
GCF_000810365.3	Acinetobacter_baumannii
GCF_003007395.1	Acinetobacter_baumannii
GCF_000810585.3	Acinetobacter_baumannii
GCF_002992645.1	Acinetobacter_baumannii
GCF_000810325.3	Acinetobacter_baumannii
GCF_002992665.1	Acinetobacter_baumannii
GCF_002992805.1	Acinetobacter_baumannii
GCF_000810065.3	Acinetobacter_baumannii
GCF_003007245.1	Acinetobacter_baumannii
GCF_002992775.1	Acinetobacter_baumannii
GCF_002992865.1	Acinetobacter_baumannii
GCF_002992875.1	Acinetobacter_baumannii
GCF_002992765.1	Acinetobacter_baumannii
GCF_002992825.1	Acinetobacter_baumannii
GCF_000810205.3	Acinetobacter_baumannii
GCF_002992905.1	Acinetobacter_baumannii
GCF_003007275.1	Acinetobacter_baumannii
GCA_002332605.1	Acinetobacter_baumannii	set([])	set(['USA'])	set([])
GCF_002992715.1	Acinetobacter_baumannii
GCF_003007025.1	Acinetobacter_baumannii
GCF_002992685.1	Acinetobacter_baumannii
GCF_002992605.1	Acinetobacter_baumannii
GCF_002992745.1	Acinetobacter_baumannii
GCF_000810125.3	Acinetobacter_baumannii
GCF_002938675.1	Acinetobacter_indicus
GCF_012366755.1	Acinetobacter_indicus
GCF_012366735.1	Acinetobacter_indicus
GCF_002938685.1	Acinetobacter_indicus
GCF_012366785.1	Acinetobacter_indicus
GCF_002938645.1	Acinetobacter_indicus
GCF_012366815.1	Acinetobacter_indicus
GCF_012366715.1	Acinetobacter_indicus
GCF_012371095.1	Acinetobacter_indicus
GCF_002938695.1	Acinetobacter_indicus
GCF_012370875.1	Acinetobacter_indicus
GCF_002938815.1	Acinetobacter_indicus
GCF_012370815.1	Acinetobacter_indicus
GCF_002938805.1	Acinetobacter_indicus
GCF_002938505.1	Acinetobacter_indicus
GCF_012370935.1	Acinetobacter_indicus
GCF_012366955.1	Acinetobacter_indicus
GCF_012366855.1	Acinetobacter_indicus
GCF_002938785.1	Acinetobacter_indicus
GCF_012366895.1	Acinetobacter_indicus
GCF_002938765.1	Acinetobacter_indicus
GCF_012366885.1	Acinetobacter_indicus
GCF_002938745.1	Acinetobacter_indicus
GCF_012366875.1	Acinetobacter_indicus
GCF_000413875.1	Acinetobacter_indicus
GCA_004005545.1	Acinetobacter_indicus	set([2018.0])	set(['China'])	set([])
GCF_012366935.1	Acinetobacter_indicus
GCF_012366665.1	Acinetobacter_indicus
GCF_004005445.1	Acinetobacter_indicus
GCF_012366635.1	Acinetobacter_indicus
GCF_012371125.1	Acinetobacter_indicus
GCF_012371155.1	Acinetobacter_indicus
GCF_012371165.1	Acinetobacter_indicus
GCF_012371205.1	Acinetobacter_indicus
GCF_012371235.1	Acinetobacter_indicus
GCF_012371255.1	Acinetobacter_indicus
GCF_012371275.1	Acinetobacter_indicus
GCF_012371295.1	Acinetobacter_indicus
GCF_012371075.1	Acinetobacter_indicus
GCF_000964095.1	Acinetobacter_indicus	set([2012.0])	set(['Malaysia'])	set([])
GCF_012371455.1	Acinetobacter_indicus
GCF_012371045.1	Acinetobacter_indicus
GCF_000369465.1	Acinetobacter_indicus
GCF_010918195.1	Acinetobacter_indicus
GCF_012366655.1	Acinetobacter_indicus
GCF_010917815.1	Acinetobacter_indicus
GCF_002938625.1	Acinetobacter_indicus
GCA_010918035.1	Acinetobacter_indicus	set([2017.0])	set(['China'])	set(['Mallard'])
GCF_002938585.1	Acinetobacter_indicus
GCF_012371015.1	Acinetobacter_indicus
GCF_012370985.1	Acinetobacter_indicus
GCF_012370975.1	Acinetobacter_indicus
GCF_002938565.1	Acinetobacter_indicus
GCF_002938545.1	Acinetobacter_indicus
GCF_002938515.1	Acinetobacter_indicus
GCF_012370955.1	Acinetobacter_indicus
GCF_012371115.1	Acinetobacter_indicus
GCF_002938445.1	Acinetobacter_indicus
GCF_012278715.1	Acinetobacter_indicus
GCF_012278735.1	Acinetobacter_indicus
GCF_002938605.1	Acinetobacter_indicus
GCF_002938825.1	Acinetobacter_indicus
GCF_012370915.1	Acinetobacter_indicus
GCF_009914435.1	Acinetobacter_indicus
GCF_002938865.1	Acinetobacter_indicus
GCF_001922645.1	Acinetobacter_indicus	set([2014.0])	set(['Germany'])	set(['Cattle'])
GCF_009296145.1	Acinetobacter_indicus
GCF_002938885.1	Acinetobacter_indicus
GCF_009734145.1	Acinetobacter_indicus
GCF_012370895.1	Acinetobacter_indicus
GCF_002938905.1	Acinetobacter_indicus
GCF_002938915.1	Acinetobacter_indicus
GCF_002174105.1	Acinetobacter_indicus
GCF_009914415.1	Acinetobacter_indicus
GCF_002953575.2	Acinetobacter_indicus
GCF_009914395.1	Acinetobacter_indicus
GCF_009914375.1	Acinetobacter_indicus
GCF_000488255.1	Acinetobacter_indicus
GCF_003939835.1	Acinetobacter_junii
GCF_008996015.1	Acinetobacter_junii
GCF_008999055.1	Acinetobacter_junii
GCA_002387225.1	Acinetobacter_junii	set([])	set(['USA'])	set([])
GCF_002165245.3	Acinetobacter_junii
GCF_008984045.1	Acinetobacter_junii
GCF_008993675.1	Acinetobacter_junii
GCF_008988725.1	Acinetobacter_junii
GCF_003957055.1	Acinetobacter_junii
GCF_008999855.1	Acinetobacter_junii
GCF_000813495.1	Acinetobacter_junii
GCF_000368745.1	Acinetobacter_junii
GCF_009014175.1	Acinetobacter_junii
GCF_004296305.1	Acinetobacter_junii
GCA_002328335.1	Acinetobacter_junii	set([])	set([])	set([])
GCF_009004115.1	Acinetobacter_junii
GCF_009001395.1	Acinetobacter_junii
GCF_009014455.1	Acinetobacter_junii
GCF_009013895.1	Acinetobacter_junii
GCF_000162075.1	Acinetobacter_junii
GCF_009013755.1	Acinetobacter_junii
GCF_009013555.1	Acinetobacter_junii
GCF_009013435.1	Acinetobacter_junii
GCF_009012575.1	Acinetobacter_junii
GCF_009012455.1	Acinetobacter_junii
GCF_009645695.1	Acinetobacter_junii
GCF_009012375.1	Acinetobacter_junii
GCF_009012295.1	Acinetobacter_junii
GCF_009011915.1	Acinetobacter_junii
GCF_008983685.1	Acinetobacter_junii
GCF_009004095.1	Acinetobacter_junii
GCF_009004055.1	Acinetobacter_junii
GCF_012271855.1	Acinetobacter_junii
GCF_004123275.1	Acinetobacter_junii
GCF_000368665.1	Acinetobacter_junii
GCA_001767535.1	Acinetobacter_junii	set([2011.0])	set(['USA'])	set([])
GCF_008981685.1	Acinetobacter_junii
GCF_000775815.1	Acinetobacter_junii	set([])	set(['Japan'])	set([])
GCF_004920505.1	Acinetobacter_junii
GCF_003939335.1	Acinetobacter_junii
GCF_003939355.1	Acinetobacter_junii
GCF_008979805.1	Acinetobacter_junii
GCF_004921845.1	Acinetobacter_junii
GCF_002761875.1	Acinetobacter_junii
GCA_003484365.1	Acinetobacter_junii	set([])	set([])	set([])
GCF_003940305.1	Acinetobacter_junii
GCF_000302355.1	Acinetobacter_junii
GCF_001941805.1	Acinetobacter_junii	set([1991.0])	set(['Russia'])	set([])
GCF_003293735.1	Acinetobacter_junii
GCF_008980005.1	Acinetobacter_junii
GCA_900299105.1	Acinetobacter_junii	set([])	set([])	set([])
GCF_008981205.1	Acinetobacter_junii
GCF_008980735.1	Acinetobacter_junii
GCA_009360325.1	Acinetobacter_nosocomialis	set([2015.0])	set(['Chile'])	set([])
GCF_000589215.1	Acinetobacter_nosocomialis
GCF_000589235.1	Acinetobacter_nosocomialis
GCF_000588255.1	Acinetobacter_nosocomialis
GCF_000589255.1	Acinetobacter_nosocomialis
GCF_000931675.1	Acinetobacter_nosocomialis	set([])	set(['Japan'])	set([])
GCF_001863655.1	Acinetobacter_nosocomialis	set([2014.0])	set(['China'])	set(['Human'])
GCA_002295745.1	Acinetobacter_nosocomialis	set([])	set(['USA'])	set([])
GCF_000588335.1	Acinetobacter_nosocomialis
GCF_004792395.1	Acinetobacter_nosocomialis
GCF_000836055.1	Acinetobacter_nosocomialis	set([])	set([])	set([])
GCF_000584255.1	Acinetobacter_nosocomialis
GCF_000314595.1	Acinetobacter_nosocomialis
GCF_000248315.1	Acinetobacter_nosocomialis
GCA_002322145.1	Acinetobacter_nosocomialis	set([])	set(['USA'])	set([])
GCF_000588595.1	Acinetobacter_nosocomialis
GCF_900496675.1	Acinetobacter_nosocomialis
GCF_003947625.1	Acinetobacter_nosocomialis
GCF_000162375.2	Acinetobacter_nosocomialis
GCF_002951295.1	Acinetobacter_nosocomialis
GCF_900496685.1	Acinetobacter_nosocomialis
GCF_000682615.1	Acinetobacter_nosocomialis
GCF_000584795.1	Acinetobacter_nosocomialis
GCF_900496715.1	Acinetobacter_nosocomialis
GCF_003006925.1	Acinetobacter_nosocomialis
GCF_003000705.1	Acinetobacter_nosocomialis
GCF_001861705.1	Acinetobacter_nosocomialis	set([2014.0])	set(['China'])	set(['Human'])
GCF_000300635.1	Acinetobacter_nosocomialis
GCF_000775795.1	Acinetobacter_nosocomialis	set([])	set(['Japan'])	set([])
GCA_002320905.1	Acinetobacter_nosocomialis	set([])	set(['USA'])	set([])
GCF_000694975.1	Acinetobacter_nosocomialis
GCF_001471615.2	Acinetobacter_nosocomialis
GCF_000301695.1	Acinetobacter_nosocomialis
GCF_004295305.1	Acinetobacter_nosocomialis
GCF_000335575.1	Acinetobacter_nosocomialis
GCF_000301775.1	Acinetobacter_nosocomialis
GCF_000587995.1	Acinetobacter_nosocomialis
GCF_000589115.1	Acinetobacter_nosocomialis
GCF_000584615.1	Acinetobacter_nosocomialis
GCF_000589155.1	Acinetobacter_nosocomialis
GCF_003843725.1	Acinetobacter_nosocomialis
GCF_001864205.1	Acinetobacter_nosocomialis	set([2014.0])	set(['China'])	set(['Human'])
GCA_002294545.1	Acinetobacter_nosocomialis	set([])	set(['USA'])	set([])
GCF_000588095.1	Acinetobacter_nosocomialis
GCF_009014215.1	Acinetobacter_nosocomialis
GCF_000582315.1	Acinetobacter_nosocomialis	set([2012.0])	set(['USA'])	set(['Human'])
GCF_008986985.1	Acinetobacter_nosocomialis
GCF_002145205.1	Acinetobacter_nosocomialis
GCF_008986925.1	Acinetobacter_nosocomialis
GCF_008983005.1	Acinetobacter_nosocomialis
GCF_002144915.1	Acinetobacter_nosocomialis
GCF_008979945.1	Acinetobacter_nosocomialis
GCF_008979865.1	Acinetobacter_nosocomialis
GCF_008977755.1	Acinetobacter_nosocomialis
GCF_008977335.1	Acinetobacter_nosocomialis
GCF_000472005.1	Acinetobacter_nosocomialis
GCF_008975785.1	Acinetobacter_nosocomialis
GCF_900494855.1	Acinetobacter_nosocomialis
GCF_900494785.1	Acinetobacter_nosocomialis
GCF_001056825.1	Acinetobacter_nosocomialis	set([])	set(['USA'])	set(['Human'])
GCA_002362715.1	Acinetobacter_nosocomialis	set([])	set(['USA'])	set([])
GCF_000589335.1	Acinetobacter_nosocomialis
GCF_001680455.1	Acinetobacter_nosocomialis	set([2014.0])	set(['China'])	set(['Human'])
GCA_002415405.1	Acinetobacter_nosocomialis	set([])	set(['USA'])	set([])
GCF_002137515.1	Acinetobacter_nosocomialis
GCF_008086325.1	Acinetobacter_nosocomialis
GCF_002137075.1	Acinetobacter_nosocomialis
GCF_002137015.1	Acinetobacter_nosocomialis
GCA_002418425.1	Acinetobacter_nosocomialis	set([])	set(['USA'])	set([])
GCF_008987925.1	Acinetobacter_nosocomialis
GCF_003143895.1	Acinetobacter_nosocomialis
GCA_002387805.1	Acinetobacter_nosocomialis	set([])	set(['USA'])	set([])
GCF_008994355.1	Acinetobacter_nosocomialis
GCF_009013975.1	Acinetobacter_nosocomialis
GCF_007680125.1	Acinetobacter_nosocomialis
GCF_009013715.1	Acinetobacter_nosocomialis
GCF_009013155.1	Acinetobacter_nosocomialis
GCF_009588945.1	Acinetobacter_nosocomialis
GCF_009645555.1	Acinetobacter_nosocomialis
GCF_009645875.1	Acinetobacter_nosocomialis
GCF_000529215.1	Acinetobacter_nosocomialis
GCF_009005455.1	Acinetobacter_nosocomialis
GCF_009002455.1	Acinetobacter_nosocomialis
GCF_009001295.1	Acinetobacter_nosocomialis
GCA_002381845.1	Acinetobacter_nosocomialis	set([])	set(['USA'])	set([])
GCF_009001155.1	Acinetobacter_nosocomialis
GCF_009000895.1	Acinetobacter_nosocomialis
GCF_009000675.1	Acinetobacter_nosocomialis
GCA_002383085.1	Acinetobacter_nosocomialis	set([])	set(['USA'])	set([])
GCF_009000615.1	Acinetobacter_nosocomialis
GCF_008998055.1	Acinetobacter_nosocomialis
GCF_008995935.1	Acinetobacter_nosocomialis
GCF_008994735.1	Acinetobacter_nosocomialis
GCF_002166815.1	Acinetobacter_nosocomialis
GCF_008994715.1	Acinetobacter_nosocomialis
GCF_002161975.1	Acinetobacter_nosocomialis
GCF_900495365.1	Acinetobacter_nosocomialis
GCA_900476845.2	Acinetobacter_nosocomialis
GCA_002414745.1	Acinetobacter_nosocomialis	set([])	set(['USA'])	set([])
GCF_000814165.3	Acinetobacter_nosocomialis	set([2012.0])	set(['Colombia'])	set(['Human'])
GCA_002338175.1	Acinetobacter_nosocomialis	set([])	set(['USA'])	set([])
GCA_003359505.2	Acinetobacter_nosocomialis
GCA_002434135.1	Acinetobacter_nosocomialis	set([])	set(['USA'])	set([])
GCA_002420605.1	Acinetobacter_nosocomialis	set([])	set(['USA'])	set([])
GCF_000368605.1	Acinetobacter_nosocomialis
GCF_003007575.1	Acinetobacter_nosocomialis
GCF_001433095.1	Acinetobacter_nosocomialis	set([2006.0])	set(['USA'])	set(['Human'])
GCA_002332705.1	Acinetobacter_nosocomialis	set([])	set(['USA'])	set([])
GCF_000368085.1	Acinetobacter_nosocomialis
GCA_002452475.1	Acinetobacter_nosocomialis	set([])	set(['USA'])	set([])
GCF_006367385.1	Acinetobacter_nosocomialis
GCA_002331545.1	Acinetobacter_nosocomialis	set([])	set(['USA'])	set([])
GCA_003453175.1	Acinetobacter_nosocomialis	set([])	set([])	set([])
GCF_000949715.1	Acinetobacter_nosocomialis	set([])	set(['Japan'])	set([])
GCF_000949675.1	Acinetobacter_nosocomialis	set([])	set(['Japan'])	set([])
GCA_002454625.1	Acinetobacter_nosocomialis	set([])	set(['USA'])	set([])
GCF_000582095.1	Acinetobacter_nosocomialis
GCF_003007235.1	Acinetobacter_nosocomialis
GCF_003007175.1	Acinetobacter_nosocomialis
GCF_002082665.1	Acinetobacter_nosocomialis
GCF_000802905.1	Acinetobacter_nosocomialis
GCF_000582255.1	Acinetobacter_nosocomialis
GCF_000582055.1	Acinetobacter_nosocomialis
GCA_002429525.1	Acinetobacter_nosocomialis	set([])	set(['USA'])	set([])
GCA_002333365.1	Acinetobacter_nosocomialis	set([])	set(['USA'])	set([])
GCA_002333295.1	Acinetobacter_nosocomialis	set([])	set(['USA'])	set([])
GCF_900495745.1	Acinetobacter_nosocomialis
GCF_001414835.1	Acinetobacter_nosocomialis	set([2008.0])	set(['USA'])	set(['Human'])
GCA_003359375.2	Acinetobacter_nosocomialis
GCA_003359355.2	Acinetobacter_nosocomialis
GCA_002340465.1	Acinetobacter_nosocomialis	set([])	set(['USA'])	set([])
GCF_000580675.1	Acinetobacter_nosocomialis
GCA_003359395.2	Acinetobacter_nosocomialis
GCA_002420985.1	Acinetobacter_nosocomialis	set([])	set(['USA'])	set([])
GCA_003359435.2	Acinetobacter_nosocomialis
GCA_002421045.1	Acinetobacter_nosocomialis	set([])	set(['USA'])	set([])
GCF_001706155.1	Acinetobacter_pittii	set([2013.0])	set(['Belgium'])	set(['Human'])
GCF_003978965.1	Acinetobacter_pittii
GCF_000230465.1	Acinetobacter_pittii
GCF_001706425.1	Acinetobacter_pittii	set([2012.0])	set(['Germany'])	set(['Human'])
GCF_000163635.1	Acinetobacter_pittii
GCF_003954385.1	Acinetobacter_pittii
GCF_001706205.1	Acinetobacter_pittii	set([2015.0])	set(['Germany'])	set(['Human'])
GCF_000746375.1	Acinetobacter_pittii	set([])	set([])	set([])
GCF_000800555.1	Acinetobacter_pittii
GCF_001706415.1	Acinetobacter_pittii	set([2011.0])	set(['Germany'])	set(['Human'])
GCF_001706355.1	Acinetobacter_pittii	set([2011.0])	set(['Germany'])	set(['Human'])
GCF_001706315.1	Acinetobacter_pittii	set([2011.0])	set(['Germany'])	set(['Human'])
GCF_001706525.1	Acinetobacter_pittii	set([1991.0])	set(['Germany'])	set(['Human'])
GCF_001706495.1	Acinetobacter_pittii	set([2010.0])	set(['Germany'])	set(['Human'])
GCF_000800865.1	Acinetobacter_pittii
GCF_001706225.1	Acinetobacter_pittii	set([2014.0])	set(['Germany'])	set(['Human'])
GCF_001663695.1	Acinetobacter_pittii	set([2014.0])	set(['India'])	set([])
GCF_001706135.1	Acinetobacter_pittii	set([2010.0])	set(['Germany'])	set(['Human'])
GCF_000191145.1	Acinetobacter_pittii
GCF_001716945.1	Acinetobacter_pittii	set([])	set(['China'])	set(['Human'])
GCF_001716955.1	Acinetobacter_pittii	set([])	set(['China'])	set(['Human'])
GCF_001716935.1	Acinetobacter_pittii	set([])	set(['China'])	set(['Human'])
GCF_001706055.1	Acinetobacter_pittii	set([1991.0])	set(['Germany'])	set(['Human'])
GCF_001706065.1	Acinetobacter_pittii	set([1990.0])	set(['Germany'])	set(['Human'])
GCF_001698835.1	Acinetobacter_pittii	set([2015.0])	set(['South Korea'])	set([])
GCF_001713685.1	Acinetobacter_pittii	set([2011.0])	set(['Germany'])	set(['Human'])
GCF_001713675.1	Acinetobacter_pittii	set([2015.0])	set(['Germany'])	set(['Human'])
GCF_001713665.1	Acinetobacter_pittii	set([2014.0])	set(['Germany'])	set(['Human'])
GCF_001706435.1	Acinetobacter_pittii	set([1992.0])	set(['Germany'])	set(['Human'])
GCF_000817365.1	Acinetobacter_pittii
GCF_001707545.1	Acinetobacter_pittii	set([2015.0])	set(['USA'])	set(['Cow'])
GCF_001706715.1	Acinetobacter_pittii	set([1992.0])	set(['Germany'])	set(['Human'])
GCF_001861625.1	Acinetobacter_pittii	set([2014.0])	set(['China'])	set(['Human'])
GCF_001706215.1	Acinetobacter_pittii	set([2011.0])	set(['Germany'])	set(['Human'])
GCF_001706115.1	Acinetobacter_pittii	set([2011.0])	set(['Germany'])	set(['Human'])
GCF_001706695.1	Acinetobacter_pittii	set([2011.0])	set(['Germany'])	set(['Human'])
GCF_001706045.1	Acinetobacter_pittii	set([1992.0])	set(['Germany'])	set(['Human'])
GCF_001706575.1	Acinetobacter_pittii	set([2015.0])	set(['Germany'])	set(['Human'])
GCF_000805655.1	Acinetobacter_pittii
GCF_001706125.1	Acinetobacter_pittii	set([2012.0])	set(['Germany'])	set(['Human'])
GCF_000787015.1	Acinetobacter_pittii
GCF_001684275.1	Acinetobacter_pittii	set([2009.0])	set(['Brazil'])	set(['Human'])
GCF_003956065.1	Acinetobacter_pittii
GCF_001706035.1	Acinetobacter_pittii	set([2009.0])	set(['Turkey'])	set(['Human'])
GCF_001706555.1	Acinetobacter_pittii	set([2013.0])	set(['Germany'])	set(['Human'])
GCF_000588535.1	Acinetobacter_pittii
GCF_004209305.1	Acinetobacter_pittii
GCF_002145325.1	Acinetobacter_pittii
GCF_002145265.1	Acinetobacter_pittii
GCF_002145235.1	Acinetobacter_pittii
GCF_006538605.1	Acinetobacter_pittii
GCF_002144885.1	Acinetobacter_pittii
GCF_002144875.1	Acinetobacter_pittii
GCF_002144035.1	Acinetobacter_pittii
GCF_002143895.1	Acinetobacter_pittii
GCF_009822185.1	Acinetobacter_pittii
GCF_002143595.1	Acinetobacter_pittii
GCF_002143505.1	Acinetobacter_pittii
GCF_002143175.1	Acinetobacter_pittii
GCF_002143135.1	Acinetobacter_pittii
GCF_002158945.1	Acinetobacter_pittii
GCF_002138225.1	Acinetobacter_pittii
GCF_002137935.1	Acinetobacter_pittii
GCF_001056355.1	Acinetobacter_pittii	set([])	set(['USA'])	set(['Human'])
GCF_002137885.1	Acinetobacter_pittii
GCF_002137855.1	Acinetobacter_pittii
GCF_002137805.1	Acinetobacter_pittii
GCF_009887685.1	Acinetobacter_pittii
GCF_002137615.1	Acinetobacter_pittii
GCF_002137415.1	Acinetobacter_pittii
GCF_002137365.1	Acinetobacter_pittii
GCF_009931315.1	Acinetobacter_pittii
GCF_002137175.1	Acinetobacter_pittii
GCF_002137145.1	Acinetobacter_pittii
GCF_002137125.1	Acinetobacter_pittii
GCF_002138095.1	Acinetobacter_pittii
GCF_002137115.1	Acinetobacter_pittii
GCF_002161985.1	Acinetobacter_pittii
GCF_009646055.1	Acinetobacter_pittii
GCF_000588415.1	Acinetobacter_pittii
GCF_000588395.1	Acinetobacter_pittii
GCF_000588015.1	Acinetobacter_pittii
GCF_002999115.2	Acinetobacter_pittii
GCF_002999215.3	Acinetobacter_pittii
GCF_000584815.1	Acinetobacter_pittii
GCF_003006915.1	Acinetobacter_pittii
GCF_000584575.1	Acinetobacter_pittii
[truncated: 52,193 more rows]
[truncated: 485 more columns]
