# Supplementary material for: Alleleomes characterize the survivors of 3.5 billion years of bacterial evolution
Source: Research Square preprint supplement (doi:10.21203/rs.3.rs-3168663/v1), 2023-07-27
Supplement: Supplementary file 2 [file f45d1155d6196b8bc84fcb83.xlsx]

## Sheet: Sheet1
species	directory	abbreviation	number of WGS	SynMuts	NonSynMuts	Pan-genome Size	eskapee	pathogenic	host	comments	link	phyla	family	genus
Bifidobacterium adolescentis	Bifidobacterium_adolescentis	BifAdo	62	812060	318298	2269		no	gut flora	produces GABA neurotransmiter, playes role in anxiety and depression	https://www.nature.com/articles/s41598-020-70986-z	Actinomycetota	Bifidobacteriaceae	Bifidobacterium
Bifidobacterium bifidum	Bifidobacterium_bifidum	BifBif	58	300335	202992	2442		no	gut flora	early human gut microbiota	https://www.ncbi.nlm.nih.gov/pmc/articles/PMC6920858/	Actinomycetota	Bifidobacteriaceae	Bifidobacterium
Bifidobacterium breve	Bifidobacterium_breve	BifBre	81	814845	350803	2516		no	intestine flora	used as food supplement, early gut microbiota	https://www.ncbi.nlm.nih.gov/pmc/articles/PMC6265827/	Actinomycetota	Bifidobacteriaceae	Bifidobacterium
Bifidobacterium globosum	Bifidobacterium_globosum	BifGlo	57	1080547	402003	2478		no	animals rumen			Actinomycetota	Bifidobacteriaceae	Bifidobacterium
Bifidobacterium longum	Bifidobacterium_longum	BifLon	281	3036598	1265484	2819		no	intestine flora			Actinomycetota	Bifidobacteriaceae	Bifidobacterium
Bifidobacterium pseudocatenulatum	Bifidobacterium_pseudocatenulatum	BifPse	68	694872	267109	2603		no	gut flora			Actinomycetota	Bifidobacteriaceae	Bifidobacterium
Corynebacterium diphtheriae	Corynebacterium_diphtheriae	CorDip	147	2069358	722609	3506		yes	human pathogen, has been found in animals	causes diptheria; fevers, neck swelling, skin lesions. Produced toxin, requires nicotinic and pantothenic acids for growth	https://www.ncbi.nlm.nih.gov/books/NBK7971/	Actinomycetota	Corynebacteriaceae	Corynebacterium
Corynebacterium pseudotuberculosis	Corynebacterium_pseudotuberculosis	CorPse	80	425404	167688	2321		no	ruminants and horses	affects animals (sheep/goats/cows/horses)	https://www.ncbi.nlm.nih.gov/pmc/articles/PMC8710256/	Actinomycetota	Corynebacteriaceae	Corynebacterium
Cutibacterium acnes	Cutibacterium_acnes	CutAcn	164	1595388	763348	3256		opportunistic	skin flora	problematic for surgery		Actinomycetota	Propionibacteriaceae	Cutibacterium
Micrococcus luteus	Micrococcus_luteus	MicLut	79	1167062	666629	2337		opportunistic	skin flora	especially in immunocompromised or those with catheters. Resists antibiotic by slowing down metabolism. Has a high GC content. Its genetic code is not static (novel codon usage).		Actinomycetota	Micrococcaceae	Micrococcus
Mycobacterium abscessus	Mycobacterium_abscessus	MycAbs	613	20900767	6162402	5850		yes	environmental bacteria, human pathogen	rapidly growing, multidrug-resistant nontuberculous mycobacteriam that causes skin and soft tissue disease, central nervous system infections, bacteremia and ocular infections. "erm" gene differentiations two major subspecies; this gene provides resistant to macrolides	https://www.ncbi.nlm.nih.gov/pmc/articles/PMC4550155/	Actinomycetota	Mycobacteriaceae	Mycobacterium
Mycobacterium avium	Mycobacterium_avium	MycAvi	177	3257708	1442936	6265		opportunistic	environmental bacteria, human pathogen	pulmonary infections in immuno-compromised hosts. Rapidly growing number of infections (MAC lung disease)	https://bmcinfectdis.biomedcentral.com/articles/10.1186/s12879-018-3113-x	Actinomycetota	Mycobacteriaceae	Mycobacterium
Mycobacterium tuberculosis	Mycobacterium_tuberculosis	MycTub	3223	3670052	3651070	4122		yes	human pathogen	one of the biggest causes of mortality among infectious diseases; 2 million per year,	https://www.ncbi.nlm.nih.gov/pmc/articles/PMC164219/	Actinomycetota	Mycobacteriaceae	Mycobacterium
Rathayibacter sp002930885	Rathayibacter_sp002930885	RatSp0	53	1047465	386734	4159		no	soil	phytopathogenic, produce extracellular polysaccharides in infected plants resutling in bacteriosis diseases with common names such as yellow slie and bacterial head blight. R. toxicus causes infection in grazing animals	https://apsjournals.apsnet.org/doi/10.1094/PHYTO-02-17-0047-RVW	Actinomycetota	Microbacteriaceae	Rathayibacter
Streptomyces albidoflavus	Streptomyces_albidoflavus	StrAlb	52	1761950	915290	7357		no	soil	high GC content, decompose insoluble polymers,	https://journals.asm.org/doi/10.1128/AEM.02925-14	Actinomycetota	Streptomycetaceae	Streptomyces
Bacteroides fragilis	Bacteroides_fragilis	BacFra	98	1758251	744003	4871		no	colon flora	most common orgnism invovled in intrabdominal infection, disruption of tissue barriers and spread of intestinal flora into adjacent tissue casues polymicrobial infection,	https://www.ncbi.nlm.nih.gov/books/NBK553032/	Bacteroidota	Bacteroidaceae	Bacteroides
Bacteroides uniformis	Bacteroides_uniformis	BacUni	110	4074458	1318949	5261		no	colon flora	shown to combat obesity in mice	https://www.nature.com/articles/s41598-021-90888-y	Bacteroidota	Bacteroidaceae	Bacteroides
Bacteroides xylanisolvens	Bacteroides_xylanisolvens	BacXyl	52	2696841	781426	6474		no	uterine flora	Virulence determinants known to occur in the genus Bacteroides, such the bft enterotoxin and other enzymatic activities involved in the degradation of the extracellular matrix and the capsular polysaccharide PS A, are absent in this species	https://www.ncbi.nlm.nih.gov/pmc/articles/PMC3255732/	Bacteroidota	Bacteroidaceae	Bacteroides
Flavobacterium psychrophilum	Flavobacterium_psychrophilum	FlaPsy	77	246633	133260	2950		no	trout pathogen	bacterial cold-water disease affecting salmon and trout	https://www.frontiersin.org/articles/10.3389/fmicb.2019.01711/full	Bacteroidota	Flavobacteriaceae	Flavobacterium
Phocaeicola vulgatus	Phocaeicola_vulgatus	PhoVul	106	1916617	790643	6203		yes	gut flora	produces antibacterial toxin	https://journals.asm.org/doi/10.1128/mra.01124-21	Bacteroidota	Bacteroidaceae	Phocaeicola
Porphyromonas gingivalis	Porphyromonas_gingivalis	PorGin	62	554461	246220	1919		yes	oral pathogen	oral pathogen	https://www.ncbi.nlm.nih.gov/pmc/articles/PMC4746253/	Bacteroidota	Porphyromonadaceae	Porphyromonas
Prevotella copri	Prevotella_copri	PreCop	65	1725979	636517	4516		no	human gut	plays role in rheumatoid arthritis	https://www.ncbi.nlm.nih.gov/pmc/articles/PMC6912755/	Bacteroidota	Prevotellaceae	Prevotella
Parabacteroides distasonis	Parabacteroides_distasonis	ParDis	80	2907943	1002101	5655		opportunistic	gut flora	evidence of pathogenicity, but is oppurtunistic. Emerging antimicrobial resistance	https://www.ncbi.nlm.nih.gov/pmc/articles/PMC8253142/	Bacteroidota	Tannerellaceae	Parabacteroides
Campylobacter_D coli	Campylobacter_D_coli	CamDCol	445	3603529	1572237	2628		yes	gut flora of birds and some mammals	most frequently reported foodborn illness in europe, contamination of poultry	https://www.ncbi.nlm.nih.gov/pmc/articles/PMC4526750/	Campylobacterota	Campylobacteraceae	Campylobacter
Campylobacter_D coli_A	Campylobacter_D_coli_A	CamDColA	67	913286	221306	1998		yes	gut flora of birds and some mammals	most frequently reported foodborn illness in europe, contamination of poultry	https://www.ncbi.nlm.nih.gov/pmc/articles/PMC4526750/	Campylobacterota	Campylobacteraceae	Campylobacter
Campylobacter_D jejuni	Campylobacter_D_jejuni	CamDJej	1008	11872671	4692326	2593		yes	gut flora of birds and some mammals	most frequently reported foodborn illness in europe, contamination of poultry	https://www.ncbi.nlm.nih.gov/pmc/articles/PMC4526750/	Campylobacterota	Campylobacteraceae	Campylobacter
Helicobacter pylori	Helicobacter_pylori	HelPyl	739	18005336	8191586	2381		yes	human pathogen	can cause ulcers in upper digesitve tract. Transmitted during childhood but persists if untreated, colonizes epithelium in acidic environment, acquired by humans at least 100,000 years ago,	https://www.nature.com/articles/s41572-023-00431-8	Campylobacterota	Helicobacteraceae	Helicobacter
Helicobacter pylori_BU	Helicobacter_pylori_BU	HelPylBU	341	8046477	3397574	2044		yes	human pathogen	can cause ulcers in upper digesitve tract. Transmitted during childhood but persists if untreated, colonizes epithelium in acidic environment, acquired by humans at least 100,000 years ago,	https://www.nature.com/articles/s41572-023-00431-8	Campylobacterota	Helicobacteraceae	Helicobacter
Helicobacter pylori_C	Helicobacter_pylori_C	HelPylC	268	4315245	2076944	2094		yes	human pathogen	can cause ulcers in upper digesitve tract. Transmitted during childhood but persists if untreated, colonizes epithelium in acidic environment, acquired by humans at least 100,000 years ago,	https://www.nature.com/articles/s41572-023-00431-8	Campylobacterota	Helicobacteraceae	Helicobacter
Chlamydia trachomatis	Chlamydia_trachomatis	ChlTra	104	176680	154416	974		yes	human pathogen	high genome conservation, common ancestor with environmental chalmydiae 700 million years ago, evolution within mammalian cells has been accompanied by reduction in genome-size	https://pubmed.ncbi.nlm.nih.gov/22239534/	Chlamydiota	Chlamydiaceae	Chlamydia
Methanosarcina mazei	Methanosarcina_mazei	MetMaz	56	597307	307097	3591		no	soil	dn/ds = 0.12, only 8 core genes under positive selection	https://www.nature.com/articles/ismej201531	Euryarchaeota	Methanosarcinaceae	Methanosarcina
Agathobacter rectalis	Agathobacter_rectalis	AgaRec	63	1585068	549171	4482		no	cow / sheep rumen (stomac)			Firmicutes	Lachnospiraceae	Agathobacter
Bacillus_A anthracis	Bacillus_A_anthracis	BacAAnt	148	1862585	816154	5795		yes	soil	anthrax, no major genetic diversity,	https://pubmed.ncbi.nlm.nih.gov/12224522/ and https://journals.asm.org/doi/10.1128/jb.179.3.818-824.1997	Firmicutes	Bacillaceae	Bacillus
Bacillus_A mycoides	Bacillus_A_mycoides	BacAMyc	63	2446913	1167499	6850		no	soil	forms spiral colonies when grown on agar. Can cause disease in fish, large pan-genome full of adaptive genes, plasmid genes, and prophages / insertion sequences, can adapt to low temperature	https://www.sciencedirect.com/topics/medicine-and-dentistry/bacillus-mycoides and https://journals.asm.org/doi/10.1128/Spectrum.00311-21	Firmicutes	Bacillaceae	Bacillus
Bacillus_A pseudomycoides	Bacillus_A_pseudomycoides	BacAPse	63	2077117	1124284	7192		no	soil	removes copper from soil	https://ami-journals.onlinelibrary.wiley.com/doi/abs/10.1111/jam.15343	Firmicutes	Bacillaceae	Bacillus
Bacillus_A toyonensis	Bacillus_A_toyonensis	BacAToy	165	3423646	1832013	6336		no	deep sea	produces antibacterial toxin	https://www.frontiersin.org/articles/10.3389/fcimb.2021.629116/full	Firmicutes	Bacillaceae	Bacillus
Bacillus altitudinis	Bacillus_altitudinis	BacAlt	64	1688618	468241	4303		no	high-altitude air sample	isolated from UV-stressed air sample from GPS balloon? Also isolated in indian ocean, freshwater lake , soil and silt	https://www.ncbi.nlm.nih.gov/pmc/articles/PMC5679811/	Firmicutes	Bacillaceae	Bacillus
Bacillus licheniformis	Bacillus_licheniformis	BacLic	112	656709	340658	5136		opportunistic	soil, bird feathers	spore-forming , lives on bird feathers of ground-dwelling birds, lives at 50C, used as probiotic in animal feed, has been isolated from some human infections. Food poisoning	https://www.ncbi.nlm.nih.gov/pmc/articles/PMC9549136/	Firmicutes	Bacillaceae	Bacillus
Bacillus safensis	Bacillus_safensis	BacSaf	54	2390995	626689	4288		no		isolated from spacecraft surface	https://pubmed.ncbi.nlm.nih.gov/16902000/	Firmicutes	Bacillaceae	Bacillus
Bacillus subtilis	Bacillus_subtilis	BacSub	186	4652265	1485671	3976		no	gut flora		https://www.sciencedirect.com/topics/biochemistry-genetics-and-molecular-biology/bacillus-subtilis	Firmicutes	Bacillaceae	Bacillus
Bacillus velezensis	Bacillus_velezensis	BacVel	131	3272063	1119893	3668		no	plants/soil	promotes plant growth	https://www.ncbi.nlm.nih.gov/pmc/articles/PMC6470737/	Firmicutes	Bacillaceae	Bacillus
Clostridioides difficile	Clostridioides_difficile	CloDif	532	6716425	3040760	3764		yes	human pathogen	diarrhea and colitis	https://elifesciences.org/articles/64325	Firmicutes	Peptostreptococcaceae	Clostridioides
Clostridium_F botulinum	Clostridium_F_botulinum	CloFBot	101	2392341	1425748	4416		yes	human pathogen	food borne botulism		Firmicutes	Clostridiaceae	Clostridium
Clostridium_P perfringens	Clostridium_P_perfringens	CloPPer	129	2552055	1098566	3357		yes	gut flora	food poisoning		Firmicutes	Clostridiaceae	Clostridium
Enterococcus_B faecium	Enterococcus_B_faecium	EntBFae	888	6622304	2593960	3119	yes	opportunistic	gut flora	oppurtunistic, is found in healthy individuals		Firmicutes	Enterococcaceae	Enterococcus
Enterococcus_B hirae	Enterococcus_B_hirae	EntBHir	52	447201	182050	3129		opportunistic	pork	UTI	https://www.ncbi.nlm.nih.gov/pmc/articles/PMC5727370/	Firmicutes	Enterococcaceae	Enterococcus
Enterococcus_B lactis	Enterococcus_B_lactis	EntBLac	144	2170278	731014	3195		opportunistic	gut flora			Firmicutes	Enterococcaceae	Enterococcus
Enterococcus faecalis	Enterococcus_faecalis	EntFae	731	9313881	2661848	3869		opportunistic	gut flora	oppurtunistic, is found in healthy individuals		Firmicutes	Enterococcaceae	Enterococcus
Lacticaseibacillus paracasei	Lacticaseibacillus_paracasei	LacPar	157	2097920	665483	3082		no	fermented food stuffs	probiotic		Firmicutes	Lactobacillaceae	Lacticaseibacillus
Lacticaseibacillus rhamnosus	Lacticaseibacillus_rhamnosus	LacRha	113	2507935	596370	3586		no	fermented food stuffs	probiotic, large pan genome with large range of adaptation genes	https://www.ncbi.nlm.nih.gov/pmc/articles/PMC4943194/	Firmicutes	Lactobacillaceae	Lacticaseibacillus
Lactiplantibacillus plantarum	Lactiplantibacillus_plantarum	LacPla	283	3220369	1079968	3202		no	gut flora of animals	probiotic	https://www.frontiersin.org/articles/10.3389/fmicb.2021.712236/full	Firmicutes	Lactobacillaceae	Lactiplantibacillus
Lactobacillus crispatus	Lactobacillus_crispatus	LacCri	76	1067599	351078	2492		no	vaginal flora	vaginal microbiota		Firmicutes	Lactobacillaceae	Lactobacillus
Lactobacillus delbrueckii	Lactobacillus_delbrueckii	LacDel	56	442356	275964	2258		no	fermented food stuffs	probiotic		Firmicutes	Lactobacillaceae	Lactobacillus
Lactobacillus helveticus	Lactobacillus_helveticus	LacHel	52	256367	180292	1615		no	fermented food stuffs	probiotic		Firmicutes	Lactobacillaceae	Lactobacillus
Lactococcus lactis	Lactococcus_lactis	LacLac	127	1370221	595321	3293		no	fermented food stuffs	probiotic		Firmicutes	Streptococcaceae	Lactococcus
Leuconostoc mesenteroides	Leuconostoc_mesenteroides	LeuMes	59	396270	189018	2580		opportunistic	fermented food stuffs	can be pathogenic, food poisoning		Firmicutes	Lactobacillaceae	Leuconostoc
Ligilactobacillus salivarius	Ligilactobacillus_salivarius	LigSal	127	1927437	582351	2578		no	gut flora	probiotic		Firmicutes	Lactobacillaceae	Ligilactobacillus
Limosilactobacillus fermentum	Limosilactobacillus_fermentum	LimFer	69	445597	198870	1940		no	fermented food stuffs			Firmicutes	Lactobacillaceae	Limosilactobacillus
Limosilactobacillus reuteri	Limosilactobacillus_reuteri	LimReu	87	2391817	540614	2231		no	gut flora, wide range of animals		https://bmcbiol.biomedcentral.com/articles/10.1186/s12915-023-01541-1	Firmicutes	Lactobacillaceae	Limosilactobacillus
Listeria monocytogenes	Listeria_monocytogenes	LisMon	434	6944145	1644209	3400		yes	contaminated food	food poisoning	https://pubmed.ncbi.nlm.nih.gov/26254574/	Firmicutes	Listeriaceae	Listeria
Listeria monocytogenes_B	Listeria_monocytogenes_B	LisMonB	410	4840297	1250233	3226		yes	contaminated food	food poisoning	https://pubmed.ncbi.nlm.nih.gov/26254574/	Firmicutes	Listeriaceae	Listeria
Listeria monocytogenes_C	Listeria_monocytogenes_C	LisMonC	76	1247110	300770	3187		yes	contaminated food	food poisoning	https://pubmed.ncbi.nlm.nih.gov/26254574/	Firmicutes	Listeriaceae	Listeria
Oenococcus oeni	Oenococcus_oeni	OenOen	197	694705	386373	2512		no	fermented food stuffs	hypermutable due to mutSL deletion	https://bmcgenomics.biomedcentral.com/articles/10.1186/s12864-019-5692-3	Firmicutes	Lactobacillaceae	Oenococcus
Pediococcus acidilactici	Pediococcus_acidilactici	PedAci	73	969309	282434	2858		no	food	probiotic usage is being investigated, high genetic diversiy, variable genomes, mobile elements. Antibacterial production	https://link.springer.com/article/10.1007/s12275-021-0618-6	Firmicutes	Lactobacillaceae	Pediococcus
Priestia megaterium	Priestia_megaterium	PriMeg	103	3900433	1343613	5051		no	soil	resistant to UV and arsenic		Firmicutes	Bacillaceae	Priestia
Ruminococcus_E sp900317315	Ruminococcus_E_sp900317315	RumESp9	88	477891	189395	2574		no	gut flora			Firmicutes	Oscillospiraceae	Ruminococcus
Staphylococcus_A sciuri	Staphylococcus_A_sciuri	StaASci	52	1659328	416192	3282		yes	human pathogen	emerging nosocomial pathogen, has mecA	https://www.ncbi.nlm.nih.gov/pmc/articles/PMC1151920/	Firmicutes	Staphylococcaceae	Staphylococcus
Staphylococcus argenteus	Staphylococcus_argenteus	StaArg	57	311331	154389	2828		yes		part of s. aureus complex.		Firmicutes	Staphylococcaceae	Staphylococcus
Staphylococcus aureus	Staphylococcus_aureus	StaAur	4930	66463159	26692409	3283	yes	yes				Firmicutes	Staphylococcaceae	Staphylococcus
Staphylococcus capitis	Staphylococcus_capitis	StaCap	65	878963	291394	2939		opportunistic	skin flora	in immunocompromised patients		Firmicutes	Staphylococcaceae	Staphylococcus
Staphylococcus chromogenes	Staphylococcus_chromogenes	StaChr	86	775161	273955	2473		no	cow	intramammary infection of cows		Firmicutes	Staphylococcaceae	Staphylococcus
Staphylococcus epidermidis	Staphylococcus_epidermidis	StaEpi	485	3796755	1580625	2504		opportunistic	skin flora	coagulase-negative, forms biofilms, infections when it gets inside the body, normal on the skin		Firmicutes	Staphylococcaceae	Staphylococcus
Staphylococcus haemolyticus	Staphylococcus_haemolyticus	StaHae	216	2717612	1028245	3012		opportunistic	skin flora	coagulase-negative, forms biofilms, infections when it gets inside the body, normal on the skin		Firmicutes	Staphylococcaceae	Staphylococcus
Staphylococcus hominis	Staphylococcus_hominis	StaHom	109	1351829	555908	2535		opportunistic	skin flora	coagulase-negative, forms biofilms, infections when it gets inside the body, normal on the skin		Firmicutes	Staphylococcaceae	Staphylococcus
Staphylococcus pseudintermedius	Staphylococcus_pseudintermedius	StaPse	130	681881	325387	3243		opportunistic	domestic pets	necrotizin infections in humans and dogs	https://www.frontiersin.org/articles/10.3389/fcimb.2018.00221/full	Firmicutes	Staphylococcaceae	Staphylococcus
Staphylococcus saprophyticus	Staphylococcus_saprophyticus	StaSap	71	315932	184271	3062		opportunistic	vaginal flora	UTI infections		Firmicutes	Staphylococcaceae	Staphylococcus
Staphylococcus simulans	Staphylococcus_simulans	StaSim	65	487843	164573	2808		opportunistic	skin flora	emerging coagulase-negative skin commensal strain	https://www.ncbi.nlm.nih.gov/pmc/articles/PMC5143409/	Firmicutes	Staphylococcaceae	Staphylococcus
Streptococcus agalactiae	Streptococcus_agalactiae	StrAga	778	4317027	1994926	2425		opportunistic	gut flora	most common human streptococci pathogen belonging to group B. commensal in healthy adults, affects the young, old and immunocompromised		Firmicutes	Streptococcaceae	Streptococcus
Streptococcus anginosus	Streptococcus_anginosus	StrAng	56	1069372	379246	3293		opportunistic	gut flora			Firmicutes	Streptococcaceae	Streptococcus
Streptococcus dysgalactiae	Streptococcus_dysgalactiae	StrDys	93	1001913	396432	2214		opportunistic	gut flora	normal found as part of skin flora, affects both humans and animals,		Firmicutes	Streptococcaceae	Streptococcus
Streptococcus equi	Streptococcus_equi	StrEqu	237	1526716	540107	2328		no	horse	causes the strangles in horses (fever, difficulty breathing)	https://www.sciencedirect.com/topics/pharmacology-toxicology-and-pharmaceutical-science/streptococcus-equi	Firmicutes	Streptococcaceae	Streptococcus
Streptococcus mutans	Streptococcus_mutans	StrMut	224	1019304	534748	2536		yes	mouth flora	found in dental caries		Firmicutes	Streptococcaceae	Streptococcus
Streptococcus pneumoniae	Streptococcus_pneumoniae	StrPne	4109	34206417	16080870	3258		yes	human pathogen	colonizes resipratory tract, affects children and elderly (pneumonia and meningitis)		Firmicutes	Streptococcaceae	Streptococcus
Streptococcus pseudopneumoniae	Streptococcus_pseudopneumoniae	StrPse	62	1424074	404270	2623		yes	human pathogen	associated with chronic obstructive pulmonary disease and respiratory tract infections	https://www.ncbi.nlm.nih.gov/pmc/articles/PMC6593409/	Firmicutes	Streptococcaceae	Streptococcus
Streptococcus pyogenes	Streptococcus_pyogenes	StrPyo	1392	9898155	4240086	2224		yes	human pathogen	11000-24000 cases of severe disease, such as necrotizing gasciitis		Firmicutes	Streptococcaceae	Streptococcus
Streptococcus suis	Streptococcus_suis	StrSui	488	9993486	2801038	2858		yes	pigs	found in southeast asia	https://academic.oup.com/cid/article/48/5/617/388486	Firmicutes	Streptococcaceae	Streptococcus
Streptococcus suis_P	Streptococcus_suis_P	StrSuiP	94	3434984	962111	3704		yes	pigs			Firmicutes	Streptococcaceae	Streptococcus
Streptococcus suis_W	Streptococcus_suis_W	StrSuiW	52	1526057	398148	3011		yes	pigs			Firmicutes	Streptococcaceae	Streptococcus
Mycoplasmoides pneumoniae	Mycoplasmoides_pneumoniae	MycPne	50	31254	38602	1417		yes	environmental bacteria, human pathogen	MDR		Mycoplasmatota	Metamycoplasmataceae	Mycoplasmoides
Acinetobacter baumannii	Acinetobacter_baumannii	AciBau	1644	43528822	9782858	4112	yes	yes	environmental bacteria, human pathogen			Pseudomonadota	Moraxellaceae	Acinetobacter
Acinetobacter indicus	Acinetobacter_indicus	AciInd	78	2319587	438779	3522		no	air sample	strictly aerobic, non-motile		Pseudomonadota	Moraxellaceae	Acinetobacter
Acinetobacter junii	Acinetobacter_junii	AciJun	53	1305354	367588	3834		opportunistic	environmental bacteria, human pathogen	linked to nosocomial infections including catheter-related blood stream infections and cellulitis		Pseudomonadota	Moraxellaceae	Acinetobacter
Acinetobacter nosocomialis	Acinetobacter_nosocomialis	AciNos	136	4644332	1054031	4235		opportunistic	environmental bacteria, human pathogen		https://journals.asm.org/doi/10.1128/spectrum.02836-22	Pseudomonadota	Moraxellaceae	Acinetobacter
Acinetobacter pittii	Acinetobacter_pittii	AciPit	186	9479303	1891592	4364		opportunistic	environmental bacteria, human pathogen	oxidase-negative, catalase-positive, strictly aerobic, nonmotile,		Pseudomonadota	Moraxellaceae	Acinetobacter
Acinetobacter radioresistens	Acinetobacter_radioresistens	AciRad	57	911716	298710	3543		opportunistic	environmental bacteria, human pathogen	found in blood, lungs, only 8 cases before 2020	https://www.ncbi.nlm.nih.gov/pmc/articles/PMC9612910/	Pseudomonadota	Moraxellaceae	Acinetobacter
Acinetobacter ursingii	Acinetobacter_ursingii	AciUrs	51	1802076	402957	4461		opportunistic	environmental bacteria, human pathogen	1 case study in 2003 of bacteremia, 19 patients before 2015	https://bmcinfectdis.biomedcentral.com/articles/10.1186/s12879-015-1145-z	Pseudomonadota	Moraxellaceae	Acinetobacter
Aeromonas caviae	Aeromonas_caviae	AerCav	51	1659196	439379	4566		opportunistic	environmental bacteria, human pathogen	septicemia in one patient, 2012. most infections are in immunocompromised patients.	https://www.ncbi.nlm.nih.gov/pmc/articles/PMC3696207/	Pseudomonadota	Aeromonadaceae	Aeromonas
Aeromonas veronii	Aeromonas_veronii	AerVer	81	5401070	1015700	4546		no	fish	causes disease in farmed fish	https://www.frontiersin.org/articles/10.3389/fmicb.2019.02742/full	Pseudomonadota	Aeromonadaceae	Aeromonas
Aggregatibacter actinomycetemcomitans	Aggregatibacter_actinomycetemcomitans	AggAct	55	589287	203363	2553		opportunistic	oral flora	oppurtunistic pathobiont causing periodontitis	https://www.frontiersin.org/articles/10.3389/fimmu.2019.00728/full	Pseudomonadota	Pasteurellaceae	Aggregatibacter
Agrobacterium sp000192635	Agrobacterium_sp000192635	AgrSp0	107	3587943	868036	5803		no	soil		https://www.microbiologyresearch.org/content/journal/ijsem/10.1099/ijsem.0.004278	Pseudomonadota	Rhizobiaceae	Agrobacterium
Agrobacterium tumefaciens	Agrobacterium_tumefaciens	AgrTum	120	5019303	1102596	6074		no	plant	infects eudicots	https://www.sciencedirect.com/topics/biochemistry-genetics-and-molecular-biology/agrobacterium-tumefaciens	Pseudomonadota	Rhizobiaceae	Agrobacterium
Bordetella pertussis	Bordetella_pertussis	BorPer	148	2567196	1088037	6344		yes	human pathogen	causes whooping cough, limited gene sequence variation, recent evolution favors rearrangement of genes, not snps	https://journals.asm.org/doi/10.1128/jb.00806-16	Pseudomonadota	Alcaligenaceae	Bordetella
Brucella melitensis	Brucella_melitensis	BruMel	295	498607	687843	3525		opportunistic	cows	most common cause of brucellosis. can causes disease in sheep and goats as well. Food poisoning through contaminated dairy produts	https://journals.asm.org/doi/10.1128/jb.00806-16 and https://www.ncbi.nlm.nih.gov/pmc/articles/PMC5946514/	Pseudomonadota	Brucellaceae	Brucella
Burkholderia cenocepacia	Burkholderia_cenocepacia	BurCen	172	4005628	1705076	8318		opportunistic	environmental bacteria, human pathogen	oppurtunistic, particulary dangerous for CF patients. Shows AMR resistence	https://www.frontiersin.org/articles/10.3389/fmicb.2017.01592/full	Pseudomonadota	Burkholderiaceae	Burkholderia
Burkholderia cepacia	Burkholderia_cepacia	BurCep	79	4127670	1590272	9194		opportunistic	environmental bacteria, human pathogen	shows AMR resistence		Pseudomonadota	Burkholderiaceae	Burkholderia
Burkholderia mallei	Burkholderia_mallei	BurMal	789	7678077	4641550	6702		opportunistic	horse	causes Glanders, often infects animals		Pseudomonadota	Burkholderiaceae	Burkholderia
Burkholderia multivorans	Burkholderia_multivorans	BurMul	119	5223759	1488617	7060		opportunistic	environmental bacteria, human pathogen	shows AMR resistence		Pseudomonadota	Burkholderiaceae	Burkholderia
Burkholderia ubonensis	Burkholderia_ubonensis	BurUbo	225	7792176	4060995	8136		no	soil	lives in soil, could be a resitance reservoir to other B. pseudomallei complex organisms that are human pathogens	https://journals.asm.org/doi/10.1128/AAC.01767-20	Pseudomonadota	Burkholderiaceae	Burkholderia
Citrobacter braakii	Citrobacter_braakii	CitBra	50	1289677	285915	5167		opportunistic	environmental bacteria, human pathogen	have caused sepsis in immuno compromised patients		Pseudomonadota	Enterobacteriaceae	Citrobacter
Citrobacter freundii	Citrobacter_freundii	CitFre	122	3682182	845587	5905		opportunistic	environmental bacteria, human pathogen			Pseudomonadota	Enterobacteriaceae	Citrobacter
Cronobacter sakazakii	Cronobacter_sakazakii	CroSak	167	6292705	1087859	5015		opportunistic	environmental bacteria, human pathogen	can live in very dry environment		Pseudomonadota	Enterobacteriaceae	Cronobacter
Enterobacter cloacae	Enterobacter_cloacae	EntClo	75	3508161	647154	5728	yes	opportunistic	gut flora			Pseudomonadota	Enterobacteriaceae	Enterobacter
Enterobacter cloacae_M	Enterobacter_cloacae_M	EntCloM	100	1607201	376605	6121	yes	opportunistic	gut flora			Pseudomonadota	Enterobacteriaceae	Enterobacter
Enterobacter hormaechei_A	Enterobacter_hormaechei_A	EntHorA	795	45882556	8920936	5979	yes	opportunistic	gut flora			Pseudomonadota	Enterobacteriaceae	Enterobacter
Enterobacter kobei	Enterobacter_kobei	EntKob	70	1410852	387631	5708	yes	opportunistic	gut flora			Pseudomonadota	Enterobacteriaceae	Enterobacter
Enterobacter roggenkampii	Enterobacter_roggenkampii	EntRog	100	4528002	912782	5378	yes	opportunistic	environmental bacteria, human pathogen		https://journals.asm.org/doi/10.1128/mra.00015-23#:~:text=The%20C1%2Dmetabolizing%20strain%20Enterobacter,freshwater%20stream%20in%20Hong%20Kong.	Pseudomonadota	Enterobacteriaceae	Enterobacter
Erwinia amylovora	Erwinia_amylovora	ErwAmy	117	544214	267637	3849		no	plant	plant pathogen for apple and pear trees		Pseudomonadota	Erwiniaceae	Erwinia
Escherichia albertii	Escherichia_albertii	EscAlb	84	1990560	625454	5579		yes	contaminated food	shiga-toxin producing		Pseudomonadota	Enterobacteriaceae	Escherichia
Escherichia coli	Escherichia_coli	EscCol	390	10397240	2827525	6131	yes	yes	contaminated food			Pseudomonadota	Enterobacteriaceae	Escherichia
Escherichia coli_D	Escherichia_coli_D	EscColD	268	11064052	2404207	5558	yes	yes	contaminated food			Pseudomonadota	Enterobacteriaceae	Escherichia
Escherichia dysenteriae	Escherichia_dysenteriae	EscDys	220	6466896	1613593	4663		yes	contaminated food			Pseudomonadota	Enterobacteriaceae	Escherichia
Escherichia flexneri	Escherichia_flexneri	EscFle	2414	62217396	14466187	4873		yes	contaminated food			Pseudomonadota	Enterobacteriaceae	Escherichia
Francisella tularensis	Francisella_tularensis	FraTul	164	234573	222393	1839		yes	environmental bacteria, human pathogen	causes tularemia, spread by ticks/deer flys		Pseudomonadota	Francisellaceae	Francisella
Glaesserella parasuis	Glaesserella_parasuis	GlaPar	89	1888639	526887	3001		no	pigs	pathogen commonly found in young pigs	https://www.frontiersin.org/articles/10.3389/fmicb.2023.1160433/full	Pseudomonadota	Pasteurellaceae	Glaesserella
Haemophilus influenzae	Haemophilus_influenzae	HaeInf	321	5639871	1765760	2265		yes	human pathogen			Pseudomonadota	Pasteurellaceae	Haemophilus
Haemophilus influenzae_E	Haemophilus_influenzae_E	HaeInfE	63	1096496	346759	2330		yes	human pathogen			Pseudomonadota	Pasteurellaceae	Haemophilus
Haemophilus influenzae_F	Haemophilus_influenzae_F	HaeInfF	55	693759	224750	2279		yes	human pathogen			Pseudomonadota	Pasteurellaceae	Haemophilus
Klebsiella_A grimontii	Klebsiella_A_grimontii	KleAGri	82	3616761	874930	6450		opportunistic	environmental bacteria, human pathogen		https://www.frontiersin.org/articles/10.3389/fmicb.2018.02170/full	Pseudomonadota	Enterobacteriaceae	Klebsiella
Klebsiella_A michiganensis	Klebsiella_A_michiganensis	KleAMic	122	4110908	1135800	6556		opportunistic	environmental bacteria, human pathogen		https://journals.asm.org/doi/10.1128/spectrum.04235-22#:~:text=Recently%2C%20Klebsiella%20michiganensis%2C%20which%20is,Environmental%20reservoirs%20of%20K.	Pseudomonadota	Enterobacteriaceae	Klebsiella
Klebsiella_A oxytoca	Klebsiella_A_oxytoca	KleAOxy	78	1612180	500993	6062		opportunistic	environmental bacteria, human pathogen		https://www.ncbi.nlm.nih.gov/pmc/articles/PMC5192185/	Pseudomonadota	Enterobacteriaceae	Klebsiella
Klebsiella aerogenes	Klebsiella_aerogenes	KleAer	155	5692572	1119202	5156		opportunistic	environmental bacteria, human pathogen			Pseudomonadota	Enterobacteriaceae	Klebsiella
Klebsiella pneumoniae	Klebsiella_pneumoniae	KlePne	3059	59815482	17008255	6393	yes	yes	environmental bacteria, human pathogen			Pseudomonadota	Enterobacteriaceae	Klebsiella
Klebsiella quasipneumoniae	Klebsiella_quasipneumoniae	KleQua	237	11848314	2509548	5978		opportunistic	plant symbiont			Pseudomonadota	Enterobacteriaceae	Klebsiella
Klebsiella variicola	Klebsiella_variicola	KleVar	294	7715378	1829460	5809		opportunistic	environmental bacteria, human pathogen		https://www.ncbi.nlm.nih.gov/pmc/articles/PMC6609320/	Pseudomonadota	Enterobacteriaceae	Klebsiella
Leclercia adecarboxylata	Leclercia_adecarboxylata	LecAde	57	1513604	283665	4922		yes	aquatic engironment		https://www.ncbi.nlm.nih.gov/pmc/articles/PMC7286590/	Pseudomonadota	Enterobacteriaceae	Leclercia
Legionella pneumophila	Legionella_pneumophila	LegPne	268	8243991	3346844	4103		yes	amoeba	Pontiac fever and Legionnaires' disease		Pseudomonadota	Legionellaceae	Legionella
Mannheimia haemolytica	Mannheimia_haemolytica	ManHae	88	671214	254204	2609		no	pigs	bovine respiratory disease		Pseudomonadota	Pasteurellaceae	Mannheimia
Mesorhizobium muleiense	Mesorhizobium_muleiense	MesMul	51	2572266	1134458	6942		no	plants	plant symbiont		Pseudomonadota	Phyllobacteriaceae	Mesorhizobium
Mesorhizobium sp002294985	Mesorhizobium_sp002294985	MesSp0	60	1713693	747679	7176		no				Pseudomonadota	Phyllobacteriaceae	Mesorhizobium
Moraxella catarrhalis	Moraxella_catarrhalis	MorCat	151	1371586	600354	2495		opportunistic	gut flora	colonizes upper respiratory tract,m patients with COPD		Pseudomonadota	Moraxellaceae	Moraxella
Morganella morganii	Morganella_morganii	MorMor	51	1457864	305382	4161		opportunistic	gut flora			Pseudomonadota	Morganellaceae	Morganella
Neisseria gonorrhoeae	Neisseria_gonorrhoeae	NeiGon	307	620506	542502	2310		yes	human pathogen			Pseudomonadota	Neisseriaceae	Neisseria
Neisseria meningitidis	Neisseria_meningitidis	NeiMen	1447	24950001	9409624	2771		opportunistic	nasopharynx flora			Pseudomonadota	Neisseriaceae	Neisseria
Pantoea agglomerans	Pantoea_agglomerans	PanAgg	55	1918635	387734	5120		no	insect	insect symbiont		Pseudomonadota	Erwiniaceae	Pantoea
Pantoea ananatis	Pantoea_ananatis	PanAna	52	1323135	328375	4557		yes	plant pathogen	mainly a plant pathogen		Pseudomonadota	Erwiniaceae	Pantoea
Pasteurella multocida	Pasteurella_multocida	PasMul	158	1995312	546963	2815		yes	domestic pets	bite/scracthes from pets		Pseudomonadota	Pasteurellaceae	Pasteurella
Proteus mirabilis	Proteus_mirabilis	ProMir	157	2190653	622913	4108		opportunistic	environmental bacteria, human pathogen	UTIs		Pseudomonadota	Morganellaceae	Proteus
Pseudomonas_A stutzeri	Pseudomonas_A_stutzeri	PseAStu	94	3100474	831615	4825		opportunistic	soil	only two cases of death, denitrification , degredation of pollutants and toxix metals.		Pseudomonadota	Pseudomonadaceae	Pseudomonas
Pseudomonas aeruginosa	Pseudomonas_aeruginosa	PseAer	2370	52910033	17474157	6929	yes	yes	environmental bacteria, human pathogen	most common pseudomonas infection		Pseudomonadota	Pseudomonadaceae	Pseudomonas
Pseudomonas_E amygdali	Pseudomonas_E_amygdali	PseEAmy	140	6104966	1604442	7118		no	plants	disease in woody and herbaceous plants		Pseudomonadota	Pseudomonadaceae	Pseudomonas
Pseudomonas_E avellanae	Pseudomonas_E_avellanae	PseEAve	143	10046875	2384073	6860		no	hazelnut tree	pathogenic in plants	https://www.ncbi.nlm.nih.gov/pmc/articles/PMC3783423/	Pseudomonadota	Pseudomonadaceae	Pseudomonas
Pseudomonas_E hunanensis	Pseudomonas_E_hunanensis	PseEHun	53	3524137	893730	6452		no	soil			Pseudomonadota	Pseudomonadaceae	Pseudomonas
Pseudomonas_E syringae	Pseudomonas_E_syringae	PseESyr	73	3834436	910463	6689		no	plants	pathogenic in plants	https://www.nature.com/articles/nrmicro.2018.17	Pseudomonadota	Pseudomonadaceae	Pseudomonas
Pseudomonas_E viridiflava	Pseudomonas_E_viridiflava	PseEVir	148	9742307	1755194	5278		no	plants	pathogenic in plants		Pseudomonadota	Pseudomonadaceae	Pseudomonas
Raoultella ornithinolytica	Raoultella_ornithinolytica	RaoOrn	53	623116	200477	5781		opportunistic	soil	oppurtunistic pathogen on the rise with MDR		Pseudomonadota	Enterobacteriaceae	Raoultella
Rhizobium leguminosarum	Rhizobium_leguminosarum	RhiLeg	52	2148389	707180	7979		no	plants	legume symbiont		Pseudomonadota	Rhizobiaceae	Rhizobium
Rhizobium ruizarguesonis	Rhizobium_ruizarguesonis	RhiRui	99	5201480	1713374	7502		no	soil			Pseudomonadota	Rhizobiaceae	Rhizobium
Salmonella enterica	Salmonella_enterica	SalEnt	823	21323559	5302312	5238		yes	contaminated food	food poisoning		Pseudomonadota	Enterobacteriaceae	Salmonella
Serratia marcescens_I	Serratia_marcescens_I	SerMarI	58	1895012	466986	5823		opportunistic	environmental bacteria, human pathogen	oppurtunistic pathogen that grows in phosphorus-rich environment (soap/cleaners), MDR resistance	https://www.ncbi.nlm.nih.gov/pmc/articles/PMC4231636/	Pseudomonadota	Yersiniaceae	Serratia
Serratia marcescens_K	Serratia_marcescens_K	SerMarK	112	2929723	679240	5218		opportunistic	environmental bacteria, human pathogen			Pseudomonadota	Yersiniaceae	Serratia
Sinorhizobium medicae	Sinorhizobium_medicae	SinMed	52	662978	371767	7470		no	plant symbiont	free living or plant symbionts, nitrogen fixing bacteria		Pseudomonadota	Rhizobiaceae	Sinorhizobium
Sinorhizobium meliloti	Sinorhizobium_meliloti	SinMel	189	4151572	1863171	7403		no	plant symbiont	plant symbiont		Pseudomonadota	Rhizobiaceae	Sinorhizobium
Stenotrophomonas maltophilia	Stenotrophomonas_maltophilia	SteMal	140	4549107	1303256	5742		opportunistic	environmental bacteria, human pathogen	emering MDR nosocomial pathogen, respiratory tract of CF patients		Pseudomonadota	Xanthomonadaceae	Stenotrophomonas
Vibrio cholerae	Vibrio_cholerae	VibCho	720	19030194	4033318	4141		yes	environmental bacteria, human pathogen			Pseudomonadota	Vibrionaceae	Vibrio
Vibrio cyclitrophicus	Vibrio_cyclitrophicus	VibCyc	62	1118106	289350	4463		no	marine bacteria			Pseudomonadota	Vibrionaceae	Vibrio
Vibrio lentus	Vibrio_lentus	VibLen	52	4018003	710750	6395		no	marine bacteria	pathogenic to octopuses		Pseudomonadota	Vibrionaceae	Vibrio
Vibrio parahaemolyticus	Vibrio_parahaemolyticus	VibPar	665	22063449	4729513	5241		opportunistic	shellfish	causes fever, diarrhea		Pseudomonadota	Vibrionaceae	Vibrio
Vibrio splendidus	Vibrio_splendidus	VibSpl	73	5292494	993895	5336		opportunistic	oysters	food poisoning		Pseudomonadota	Vibrionaceae	Vibrio
Vibrio vulnificus	Vibrio_vulnificus	VibVul	139	9066970	1828328	5289		yes	raw seafood	spread through open wounds, require amputation		Pseudomonadota	Vibrionaceae	Vibrio
Wolbachia pipientis	Wolbachia_pipientis	WolPip	392	1365937	939034	1404		no	arthropods	mosquitoes etc. controlling pest pathogens		Pseudomonadota	Anaplasmataceae	Wolbachia
Xanthomonas arboricola	Xanthomonas_arboricola	XanArb	60	2981688	733471	5210		no	trees	pathogenic to prunus, hazelnut, and walnut trees		Pseudomonadota	Xanthomonadaceae	Xanthomonas
Xanthomonas citri	Xanthomonas_citri	XanCit	117	3784965	1400852	4571		no	citrus	pathogenic cause of citrus canker		Pseudomonadota	Xanthomonadaceae	Xanthomonas
Xanthomonas oryzae	Xanthomonas_oryzae	XanOry	167	1110376	742529	2325		no	rice plants			Pseudomonadota	Xanthomonadaceae	Xanthomonas
Xanthomonas perforans	Xanthomonas_perforans	XanPer	155	1446937	540202	5705		no	peppers and tomato	pathogenic to plants		Pseudomonadota	Xanthomonadaceae	Xanthomonas
Xanthomonas phaseoli	Xanthomonas_phaseoli	XanPha	55	734509	277470	3944		no	beans	pathogenic		Pseudomonadota	Xanthomonadaceae	Xanthomonas
Xanthomonas vasicola	Xanthomonas_vasicola	XanVas	59	727112	357777	5549		no	corn			Pseudomonadota	Xanthomonadaceae	Xanthomonas
Xylella fastidiosa	Xylella_fastidiosa	XylFas	63	882185	569796	3297		no	sap-feeding insects	plant pathogen		Pseudomonadota	Xanthomonadaceae	Xylella
Yersinia enterocolitica	Yersinia_enterocolitica	YerEnt	122	4555464	1143153	4067		opportunistic	pork	food poisoning		Pseudomonadota	Yersiniaceae	Yersinia
Yersinia pestis	Yersinia_pestis	YerPes	247	1044450	565108	4042		yes	rat flea	plague, black death		Pseudomonadota	Yersiniaceae	Yersinia
Borreliella burgdorferi	Borreliella_burgdorferi	BorBur	62	249786	172834	1241		yes	insects	lyme disease		Spirochaetota	Borreliaceae	Borreliella
Leptospira interrogans	Leptospira_interrogans	LepInt	200	1801625	800194	3605		yes	animals	leptospirosis		Spirochaetota	Leptospiraceae	Leptospira
Akkermansia muciniphila	Akkermansia_muciniphila	AkkMuc	55	945240	389928	3259		no	gut flora	probiotic	https://www.ncbi.nlm.nih.gov/pmc/articles/PMC6223323/	Verrucomicrobiota	Akkermansiaceae	Akkermansia
CAG-791 sp900317555	CAG-791_sp900317555	CAGSp9	51	374795	135504	3712		unknown				Firmicutes	Lacnospiraceae	g__CAG-791
GCF-000787395 sp000787395	GCF-000787395_sp000787395	GCFSp0	50	59293	60570	3346		unknown				Pseudomonadota	Sedimenticolaceae	g__GCF-000787395
Total			54191	987334851	311554005	776054	12	54	<<< Pathogenic
				1298888856				58	<<< Opportunistic
